# Supplementary material
Source: PubMed Central journal article supplement (PMC6143291)
Supplement: NIHMS987156-supplement-Supplemental.pdf [file NIHMS987156-supplement-Supplemental.pdf]

# Thermal and photoinduced copper-promoted C-Se bond formation: Synthesis of 2-alkyl-1,2-benziselenazol-3(2*H*)-ones and evaluation against *Mycobacterium tuberculosis*

Sandeep Thanna,<sup>a</sup> Christopher M. Goins,<sup>a</sup> Susan E. Knudson,<sup>b</sup> Richard A. Slayden,<sup>b</sup> Donald R. Ronning,<sup>a</sup> and Steven J. Sucheck<sup>a\*</sup>

<sup>a</sup>Department of Chemistry and Biochemistry, The University of Toledo, 2801 W. Bancroft Street, Toledo, OH, USA 43606

<sup>b</sup>Mycobacteria Research Laboratories, Department of Microbiology, Immunology and Pathology, Colorado State University, Fort Collins, CO 80523

## Table of Contents

|                                                                                                                                                                                                      |     |
|------------------------------------------------------------------------------------------------------------------------------------------------------------------------------------------------------|-----|
| X-Ray crystallographic data for compound <b>8</b> .....                                                                                                                                              | S3  |
| Figure S1. Photochemical reaction setup .....                                                                                                                                                        | S5  |
| Figure S2. ESI-MS (positive) of [(phen) <sub>2</sub> Cu] <sup>+</sup> ( <b>A</b> ) in CH <sub>3</sub> CN.....                                                                                        | S6  |
| Figure S3. ESI-MS (negative) of [CuI(SeCN) <sub>2</sub> ] <sup>-</sup> ( <b>B</b> ) in CH <sub>3</sub> CN.....                                                                                       | S7  |
| Figure S4. Absorption spectrum of copper complex <b>B</b> with λ <sub>max</sub> = 242 nm (Blue) and emission spectrum at 338 (orange) obtained by excitation copper complex <b>B</b> at 242 nm. .... | S8  |
| Figure S5 Absorption spectrum of complex <b>B</b> (0.91 μM, blue), mixture of complex <b>B</b> 0.91 μM)+ <b>4b</b> 0.91 μM (orange) and compound <b>4b</b> (0.91 μM, grey).....                      | S8  |
| Figure S6. Effect of aryl halide ( <b>4b</b> ) on emission spectra of copper complex <b>B</b> (5.25 μM) in acetonitrile. Excitation wavelength: 242.....                                             | S9  |
| <hr/> NMR spectra .....                                                                                                                                                                              | S10 |
| <sup>1</sup> H-NMR of 2-phenylbenzo[ <i>d</i> ][1,2]selenazol-3(2 <i>H</i> )-one (1a) (600MHz, CDCl <sub>3</sub> ).....                                                                              | S10 |
| <sup>13</sup> C-NMR of 2-phenylbenzo[ <i>d</i> ][1,2]selenazol-3(2 <i>H</i> )-one (1a) (600MHz, MeOD).....                                                                                           | S11 |
| <sup>1</sup> H-NMR of 2-(4-methoxybenzyl)benzo[ <i>d</i> ][1,2]selenazol-3(2 <i>H</i> )-one ( <b>1b</b> ).....                                                                                       | S12 |
| <sup>13</sup> C-NMR of 2-(4-methoxybenzyl)benzo[ <i>d</i> ][1,2]selenazol-3(2 <i>H</i> )-one ( <b>1b</b> ).....                                                                                      | S13 |
| <sup>1</sup> H-NMR of 2-(2-methoxybenzyl)benzo[ <i>d</i> ][1,2]selenazol-3(2 <i>H</i> )-one ( <b>1c</b> ) .....                                                                                      | S14 |
| <sup>13</sup> C-NMR of 2-(2-methoxybenzyl)benzo[ <i>d</i> ][1,2]selenazol-3(2 <i>H</i> )-one ( <b>1c</b> ) .....                                                                                     | S15 |
| <sup>1</sup> H-NMR of 2-(4-methoxyphenyl)benzo[ <i>d</i> ][1,2]selenazol-3(2 <i>H</i> )-one ( <b>1d</b> ) .....                                                                                      | S16 |
| <sup>13</sup> C-NMR of 2-(4-methoxyphenyl)benzo[ <i>d</i> ][1,2]selenazol-3(2 <i>H</i> )-one ( <b>1d</b> ) .....                                                                                     | S17 |

|                                                                                                                                                                                                                                                                                                                                                                                    |     |
|------------------------------------------------------------------------------------------------------------------------------------------------------------------------------------------------------------------------------------------------------------------------------------------------------------------------------------------------------------------------------------|-----|
| <sup>1</sup> H-NMR of 2-benzylbenzo[ <i>d</i> ][1,2]selenazol-3(2 <i>H</i> )-one ( <b>1e</b> ).....                                                                                                                                                                                                                                                                                | S18 |
| <sup>13</sup> C-NMR of 2-benzylbenzo[ <i>d</i> ][1,2]selenazol-3(2 <i>H</i> )-one ( <b>1e</b> ).....                                                                                                                                                                                                                                                                               | S19 |
| <sup>1</sup> H-NMR of 2-allylbenzo[ <i>d</i> ][1,2]selenazol-3(2 <i>H</i> )-one ( <b>1f</b> ).....                                                                                                                                                                                                                                                                                 | S20 |
| <sup>13</sup> C-NMR of 2-allylbenzo[ <i>d</i> ][1,2]selenazol-3(2 <i>H</i> )-one ( <b>1f</b> ).....                                                                                                                                                                                                                                                                                | S21 |
| <sup>1</sup> H-NMR of 2-(cyclohexylmethyl)benzo[ <i>d</i> ][1,2]selenazol-3(2 <i>H</i> )-one ( <b>1g</b> ).....                                                                                                                                                                                                                                                                    | S22 |
| <sup>13</sup> C-NMR of 2-(cyclohexylmethyl)benzo[ <i>d</i> ][1,2]selenazol-3(2 <i>H</i> )-one ( <b>1g</b> ).....                                                                                                                                                                                                                                                                   | S23 |
| <sup>1</sup> H-NMR of 2-(4-fluorophenyl)benzo[ <i>d</i> ][1,2]selenazol-3(2 <i>H</i> )-one ( <b>1h</b> ).....                                                                                                                                                                                                                                                                      | S24 |
| <sup>13</sup> C-NMR of 2-(4-fluorophenyl)benzo[ <i>d</i> ][1,2]selenazol-3(2 <i>H</i> )-one ( <b>1h</b> ).....                                                                                                                                                                                                                                                                     | S25 |
| <sup>1</sup> H-NMR of 2-(2-fluorophenyl)benzo[ <i>d</i> ][1,2]selenazol-3(2 <i>H</i> )-one ( <b>1i</b> ).....                                                                                                                                                                                                                                                                      | S26 |
| <sup>13</sup> C-NMR of 2-(2-fluorophenyl)benzo[ <i>d</i> ][1,2]selenazol-3(2 <i>H</i> )-one ( <b>1i</b> ).....                                                                                                                                                                                                                                                                     | S27 |
| <sup>1</sup> H-NMR of 2-(4-azidophenyl)benzo[ <i>d</i> ][1,2]selenazol-3(2 <i>H</i> )-one ( <b>1j</b> ).....                                                                                                                                                                                                                                                                       | S28 |
| <sup>13</sup> C-NMR of 2-(4-azidophenyl)benzo[ <i>d</i> ][1,2]selenazol-3(2 <i>H</i> )-one ( <b>1j</b> ).....                                                                                                                                                                                                                                                                      | S29 |
| <sup>1</sup> H-NMR of 2-( <i>tert</i> -butyl)benzo[ <i>d</i> ][1,2]selenazol-3(2 <i>H</i> )-one ( <b>1k</b> ).....                                                                                                                                                                                                                                                                 | S30 |
| <sup>13</sup> C-NMR of 2-( <i>tert</i> -butyl)benzo[ <i>d</i> ][1,2]selenazol-3(2 <i>H</i> )-one ( <b>1k</b> ).....                                                                                                                                                                                                                                                                | S31 |
| <sup>1</sup> H-NMR of 2-((3 <i>R</i> ,5 <i>S</i> )-adamantan-1-yl)benzo[ <i>d</i> ][1,2]selenazol-3(2 <i>H</i> )-one ( <b>1l</b> ).....                                                                                                                                                                                                                                            | S32 |
| <sup>13</sup> C-NMR of 2-((3 <i>R</i> ,5 <i>S</i> )-adamantan-1-yl)benzo[ <i>d</i> ][1,2]selenazol-3(2 <i>H</i> )-one ( <b>1l</b> ).....                                                                                                                                                                                                                                           | S33 |
| <sup>1</sup> H-NMR of 2-cyclopentylbenzo[ <i>d</i> ][1,2]selenazol-3(2 <i>H</i> )-one ( <b>1m</b> ).....                                                                                                                                                                                                                                                                           | S34 |
| <sup>13</sup> C-NMR of 2-cyclopentylbenzo[ <i>d</i> ][1,2]selenazol-3(2 <i>H</i> )-one ( <b>1m</b> ).....                                                                                                                                                                                                                                                                          | S35 |
| <sup>1</sup> H-NMR of 2-cyclohexylbenzo[ <i>d</i> ][1,2]selenazol-3(2 <i>H</i> )-one ( <b>1n</b> ).....                                                                                                                                                                                                                                                                            | S36 |
| <sup>13</sup> C-NMR of 2-cyclohexylbenzo[ <i>d</i> ][1,2]selenazol-3(2 <i>H</i> )-one ( <b>1n</b> ).....                                                                                                                                                                                                                                                                           | S37 |
| <sup>1</sup> H-NMR of <i>N</i> -(4-azidophenyl)-2-((phenylethynyl)selanyl)benzamide ( <b>8</b> ).....                                                                                                                                                                                                                                                                              | S38 |
| <sup>13</sup> C-NMR of <i>N</i> -(4-azidophenyl)-2-((phenylethynyl)selanyl)benzamide ( <b>8</b> ).....                                                                                                                                                                                                                                                                             | S39 |
| <sup>1</sup> H-NMR of <i>N</i> -(13,16-dioxo-16-(3-(4-(3-oxobenzo[ <i>d</i> ][1,2]selenazol-2(3 <i>H</i> )-yl)phenyl)-3,9-dihydro-8 <i>H</i> -<br>dibenzo[ <i>b,f</i> ][1,2,3]triazolo[4,5- <i>d</i> ]azocin-8-yl)-3,6,9-trioxa-12-azahexadecyl)-5-((3 <i>aS</i> ,6 <i>aR</i> )-2-<br>oxohexahydro-1 <i>H</i> -thieno[3,4- <i>d</i> ]imidazol-4-yl)pentanamide ( <b>10</b> ).....  | S40 |
| <sup>13</sup> C-NMR of <i>N</i> -(13,16-dioxo-16-(3-(4-(3-oxobenzo[ <i>d</i> ][1,2]selenazol-2(3 <i>H</i> )-yl)phenyl)-3,9-dihydro-8 <i>H</i> -<br>dibenzo[ <i>b,f</i> ][1,2,3]triazolo[4,5- <i>d</i> ]azocin-8-yl)-3,6,9-trioxa-12-azahexadecyl)-5-((3 <i>aS</i> ,6 <i>aR</i> )-2-<br>oxohexahydro-1 <i>H</i> -thieno[3,4- <i>d</i> ]imidazol-4-yl)pentanamide ( <b>10</b> )..... | S41 |
| <sup>1</sup> H-NMR of 2-isobutylbenzo[ <i>d</i> ][1,2]selenazol-3(2 <i>H</i> )-one ( <b>1o</b> ).....                                                                                                                                                                                                                                                                              | S42 |
| <sup>13</sup> C-NMR of 2-isobutylbenzo[ <i>d</i> ][1,2]selenazol-3(2 <i>H</i> )-one ( <b>1o</b> ).....                                                                                                                                                                                                                                                                             | S43 |
| Figure S7. Percent <i>Mtb</i> Ag85C Activity Remaining after 40 mins of Incubation with 5 μM Inhibitor.                                                                                                                                                                                                                                                                            | S45 |
| Figure S8A. Apparent IC50 for 1,2-benzisoselenazol-3(2 <i>H</i> )-ones.....                                                                                                                                                                                                                                                                                                        | S45 |
| Figure S8B. Apparent IC50 for 2-alkyl-1,2-benzisoselenazol-3(2 <i>H</i> )-ones.....                                                                                                                                                                                                                                                                                                | S46 |

## X-Ray crystallographic structure of compound **8**

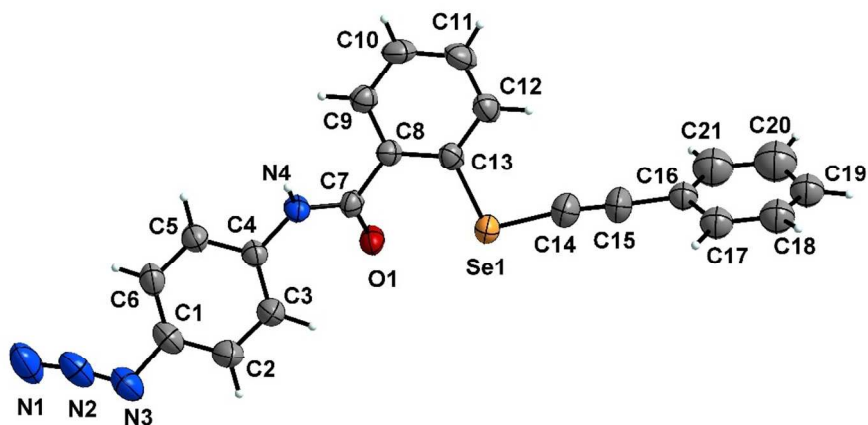

X-ray crystallographic structure of compound **8** (thermal ellipsoid level 50%).

### X-ray crystallographic structure of compound **8**

|                             |                                                    |         |
|-----------------------------|----------------------------------------------------|---------|
| <b>Identification code</b>  | Kelly2_TSN1781                                     |         |
| <b>Chemical formula</b>     | C <sub>21</sub> H <sub>14</sub> N <sub>4</sub> OSe |         |
| <b>Formula weight</b>       | 417.32 g/mol                                       |         |
| <b>Temperature</b>          | 140(2) K                                           |         |
| <b>Wavelength</b>           | 1.54178 Å                                          |         |
| <b>Crystal size</b>         | 0.030 x 0.034 x 0.364 mm                           |         |
| <b>Crystal habit</b>        | translucent colorless column                       |         |
| <b>Crystal system</b>       | orthorhombic                                       |         |
| <b>Space group</b>          | P c c n                                            |         |
| <b>Unit cell dimensions</b> | a = 17.3904(9) Å                                   | α = 90° |
|                             | b = 25.4067(13) Å                                  | β = 90° |
|                             | c = 8.3251(5) Å                                    | γ = 90° |
| <b>Volume</b>               | 3678.3(3) Å <sup>3</sup>                           |         |

|                                          |                                                                                                                         |                           |
|------------------------------------------|-------------------------------------------------------------------------------------------------------------------------|---------------------------|
| <b>Z</b>                                 | 8                                                                                                                       |                           |
| <b>Density (calculated)</b>              | 1.507 g/cm <sup>3</sup>                                                                                                 |                           |
| <b>Absorption coefficient</b>            | 2.913 mm <sup>-1</sup>                                                                                                  |                           |
| <b>F(000)</b>                            | 1680                                                                                                                    |                           |
| <b>Theta range for data collection</b>   | 3.08 to 73.22°                                                                                                          |                           |
| <b>Index ranges</b>                      | -21<=h<=21, -30<=k<=30, -9<=l<=10                                                                                       |                           |
| <b>Reflections collected</b>             | 40827                                                                                                                   |                           |
| <b>Independent reflections</b>           | 3595 [R(int) = 0.0541]                                                                                                  |                           |
| <b>Absorption correction</b>             | multi-scan                                                                                                              |                           |
| <b>Structure solution technique</b>      | direct methods                                                                                                          |                           |
| <b>Structure solution program</b>        | SHELXS-97 (Sheldrick, 1990)                                                                                             |                           |
| <b>Refinement method</b>                 | Full-matrix least-squares on F <sup>2</sup>                                                                             |                           |
| <b>Refinement program</b>                | SHELXL-97 (Sheldrick, 1997)                                                                                             |                           |
| <b>Function minimized</b>                | $\Sigma w(F_o^2 - F_c^2)^2$                                                                                             |                           |
| <b>Data / restraints /</b>               | 3595 / 5 / 298                                                                                                          |                           |
| <b>Goodness-of-fit on F<sup>2</sup></b>  | 1.042                                                                                                                   |                           |
| <b><math>\Delta/\sigma_{\max}</math></b> | 0.001                                                                                                                   |                           |
| <b>Final R indices</b>                   | 2829 data; I>2 $\sigma$ (I)                                                                                             | R1 = 0.0458, wR2 = 0.1116 |
|                                          | all data                                                                                                                | R1 = 0.0602, wR2 = 0.1208 |
| <b>Weighting scheme</b>                  | w=1/[ $\sigma^2(F_o^2)+(0.0480P)^2+7.0084P$ ]<br>where P=(F <sub>o</sub> <sup>2</sup> +2F <sub>c</sub> <sup>2</sup> )/3 |                           |
| <b>Largest diff. peak and hole</b>       | 0.565 and -0.882 eÅ <sup>-3</sup>                                                                                       |                           |
| <b>R.M.S. deviation from mean</b>        | 0.069 eÅ <sup>-3</sup>                                                                                                  |                           |

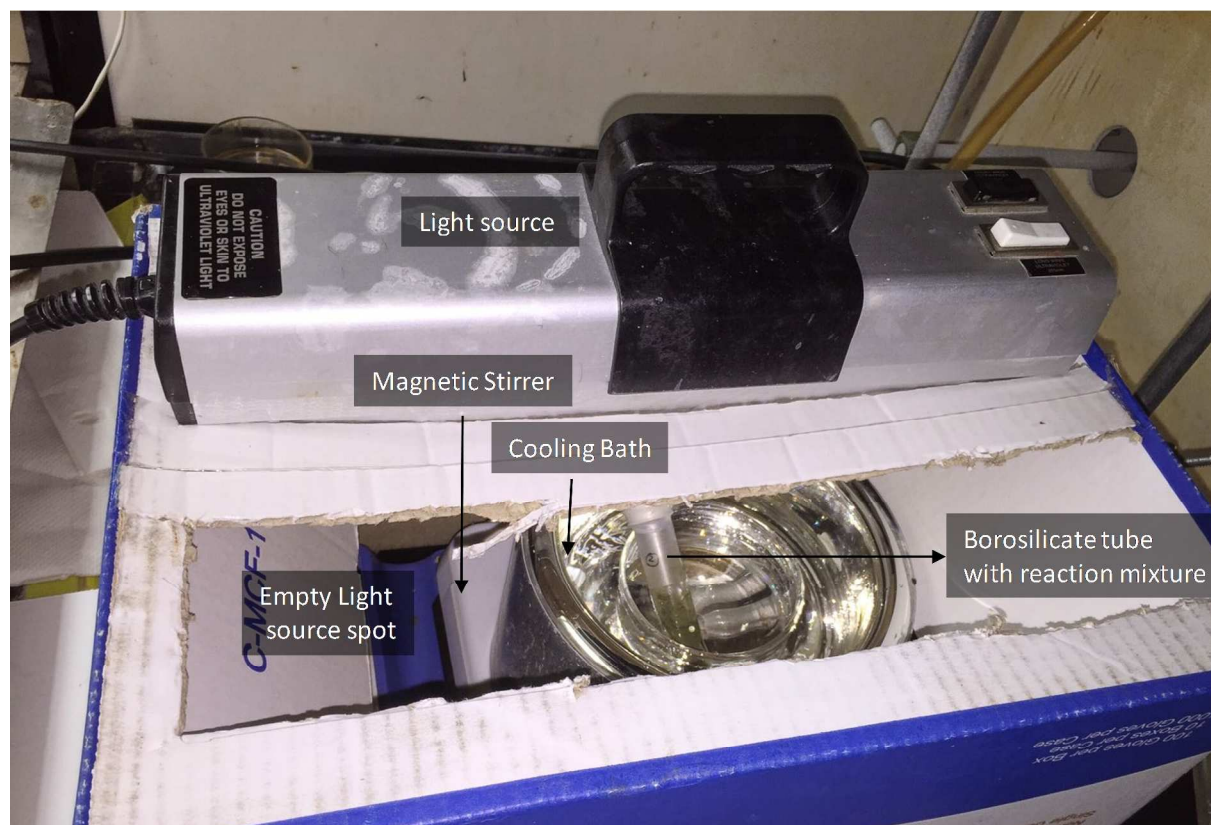

**Figure S1.** Photochemical reaction setup. The reaction setup consists of cardboard box fitted with two light sources with combined output of 22 Watts 1) 14 watts Rayonet RPR-3000A lamp (spectral energy distribution wavelength range: 250-360 nm), 2) 8 watts Spectronics Corp BLE-8T365 (365nm)).

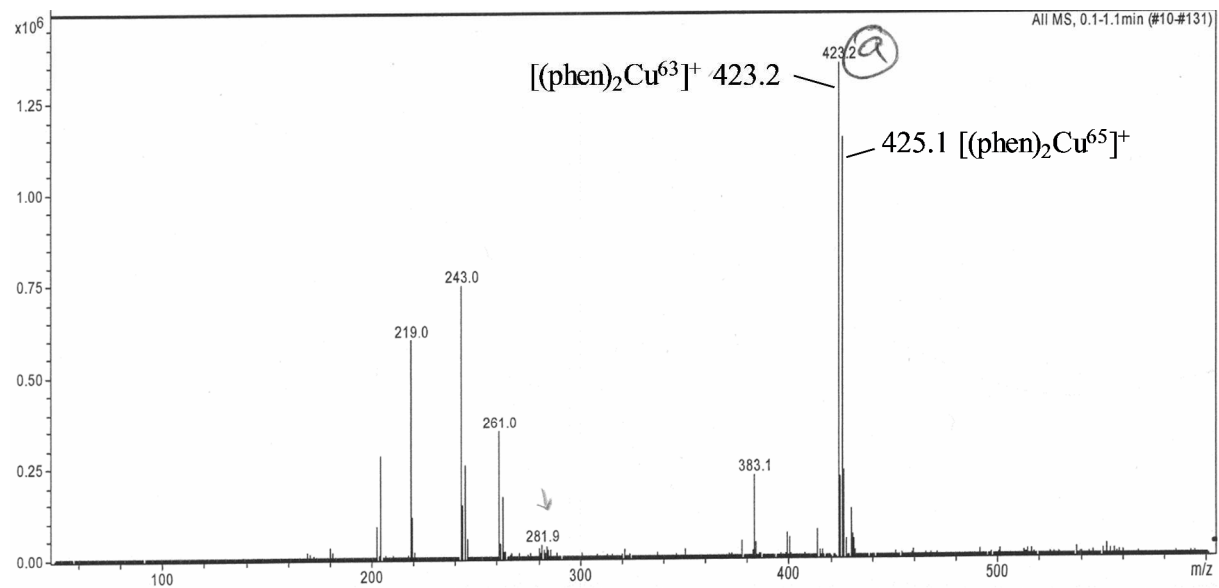

**Figure S2.** ESI-MS (positive) of  $[(\text{phen})_2\text{Cu}^{\text{I}}]^+$  (A) in  $\text{CH}_3\text{CN}$ .

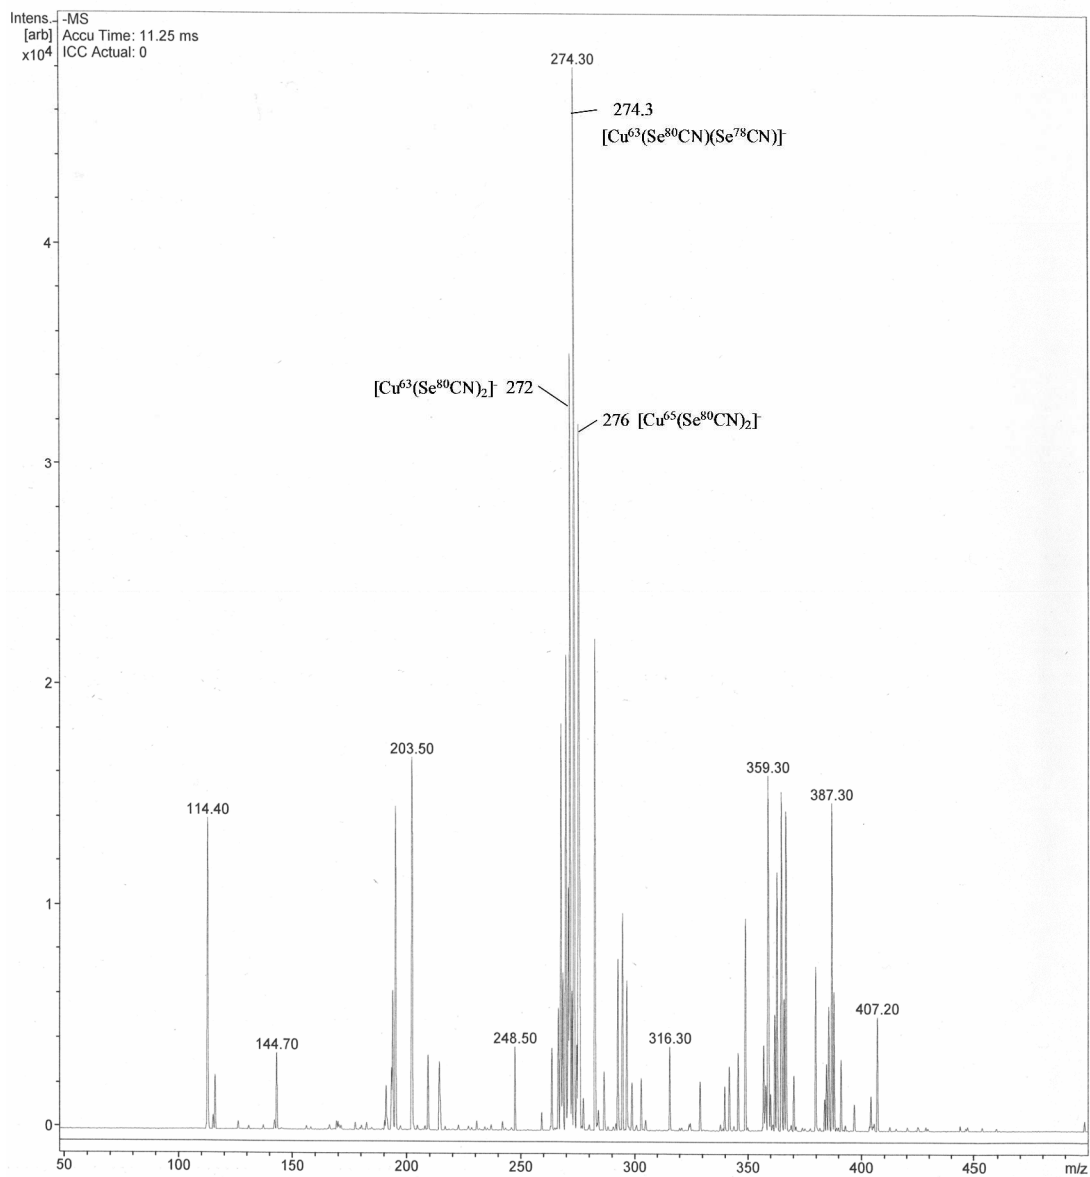

**Figure S3. ESI-MS (negative) of [CuI(SeCN)<sub>2</sub>]<sup>-</sup> (B) in CH<sub>3</sub>CN.**

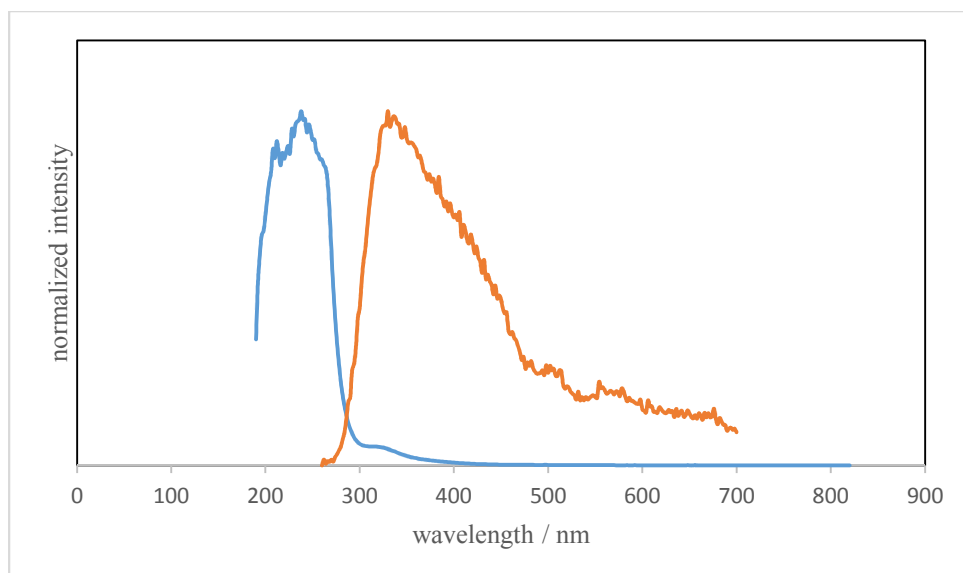

**Figure S4.** Absorption spectrum of copper complex **B** with  $\lambda_{\text{max}} = 242$  nm (Blue) and emission spectrum at 338 (orange) obtained by excitation copper complex **B** at 242 nm.

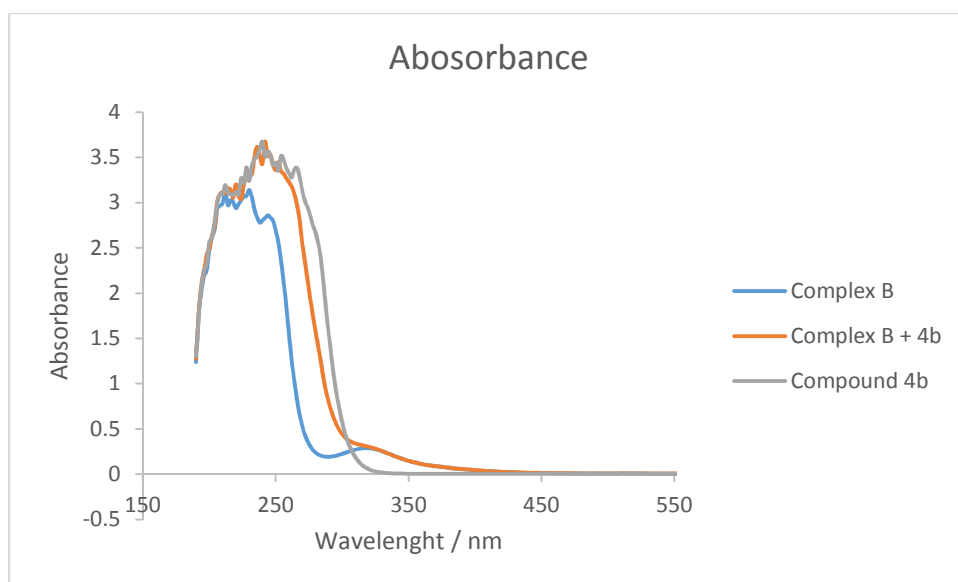

**Figure S5.** Absorption spectrum of complex **B** (0.91  $\mu\text{M}$ , blue), mixture of complex **B** 0.91  $\mu\text{M}$ + **4b** 0.91  $\mu\text{M}$  (orange) and compound **4b** (0.91  $\mu\text{M}$ , grey).



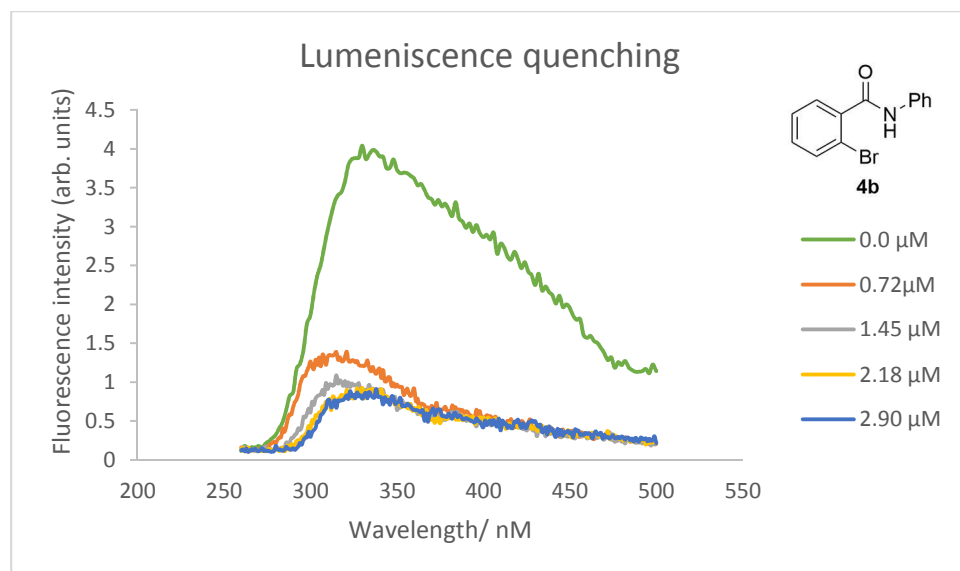

**Figure S6.** Effect of aryl halide (**4b**) on emission spectra of copper complex **B** (5.25 μM) in acetonitrile. Excitation wavelength: 242

## NMR spectra

$^1\text{H-NMR}$  of 2-phenylbenzo[*d*][1,2]selenazol-3(2*H*)-one (1a) (600MHz,  $\text{CDCl}_3$ )

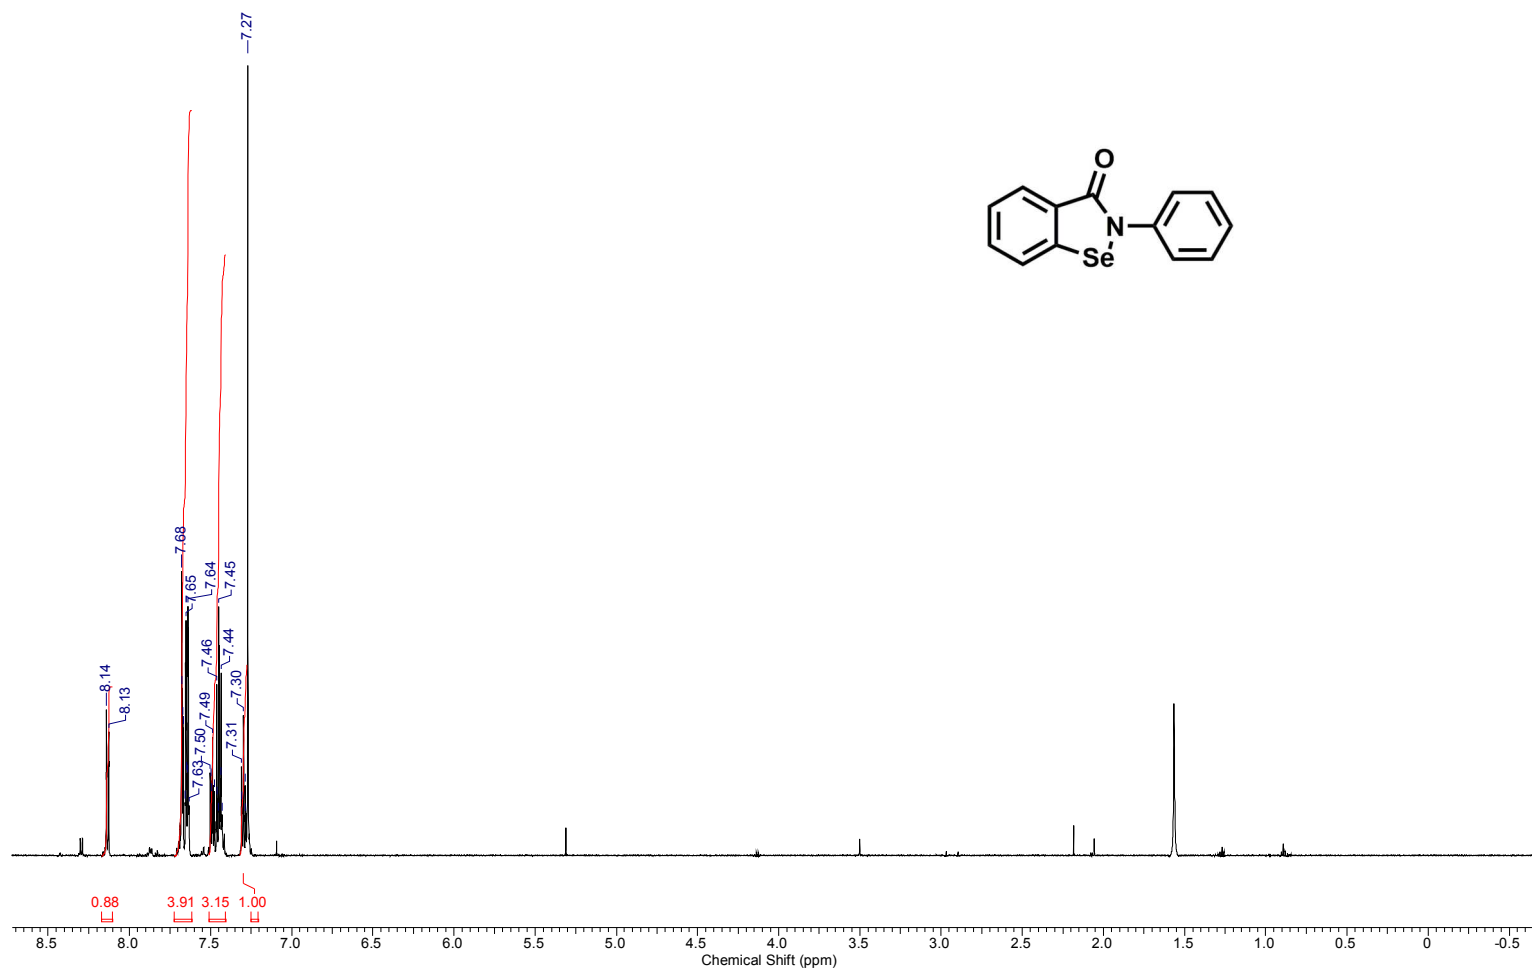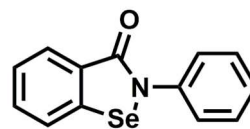

**<sup>13</sup>C-NMR of 2-phenylbenzo[*d*][1,2]selenazol-3(2*H*)-one (1a) (600MHz, MeOD)**

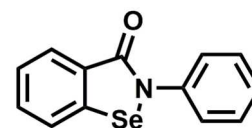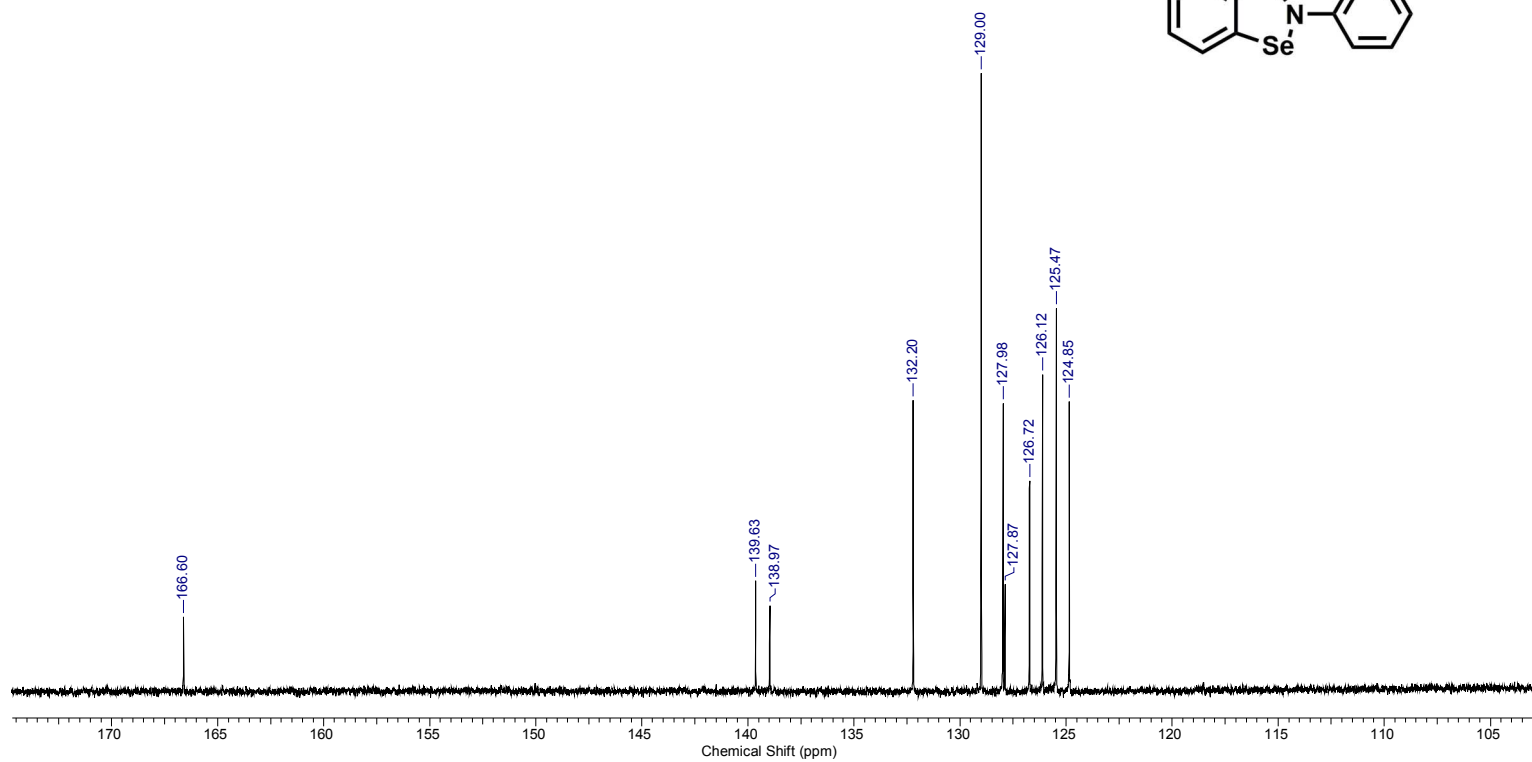

**<sup>1</sup>H-NMR of 2-(4-methoxybenzyl)benzo[d][1,2]selenazol-3(2H)-one (1b)**

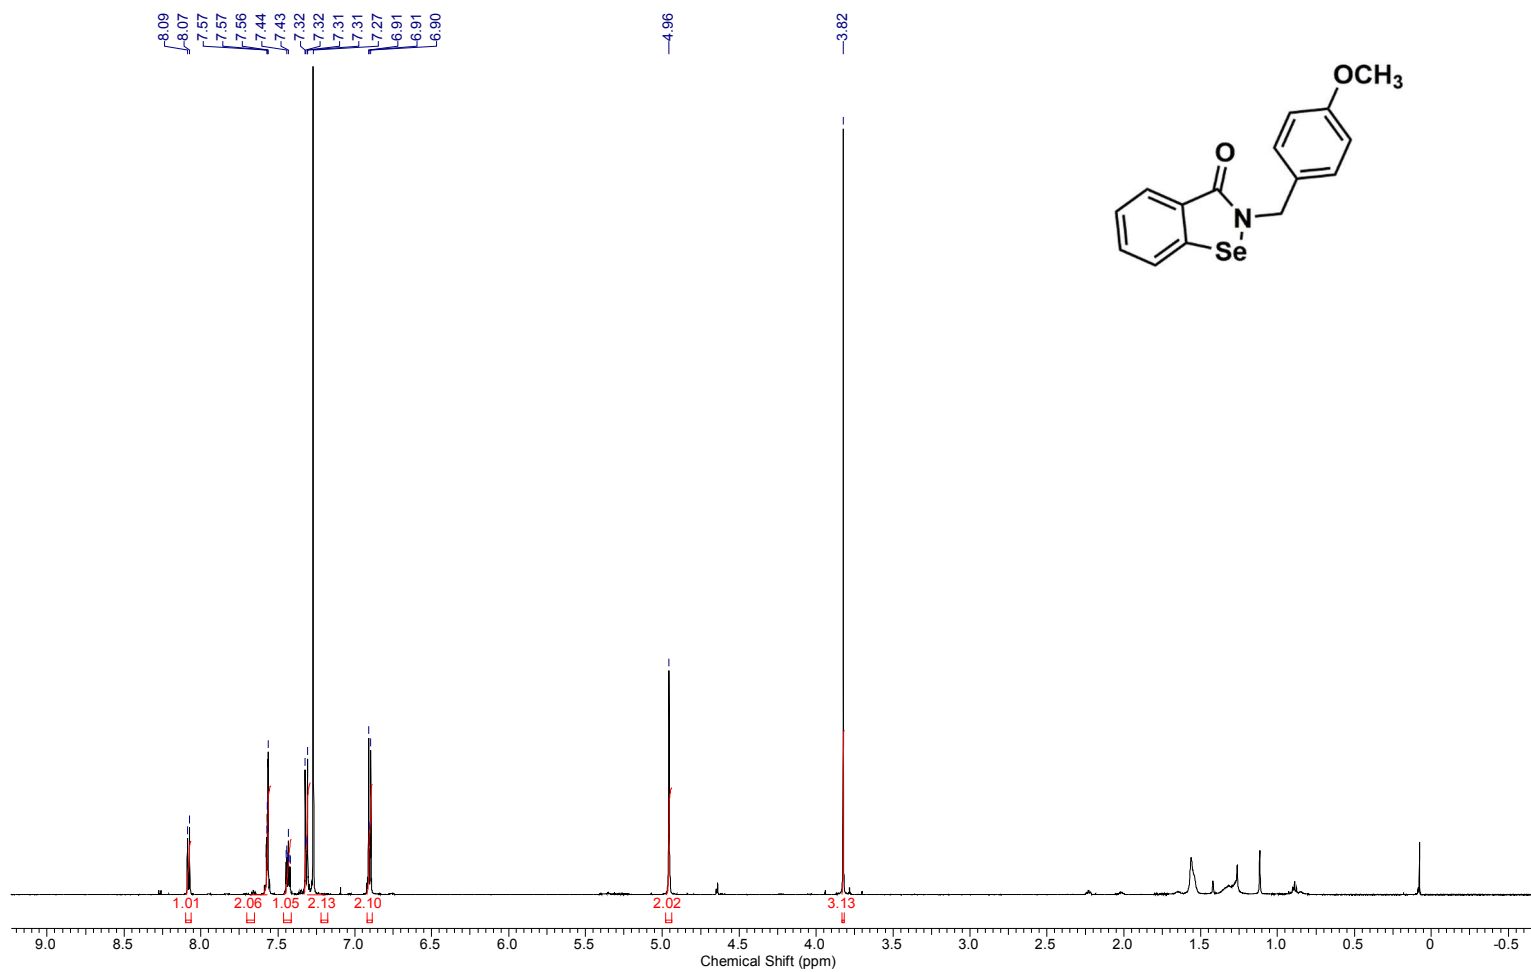

<sup>13</sup>C-NMR of 2-(4-methoxybenzyl)benzo[d][1,2]selenazol-3(2H)-one (1b)

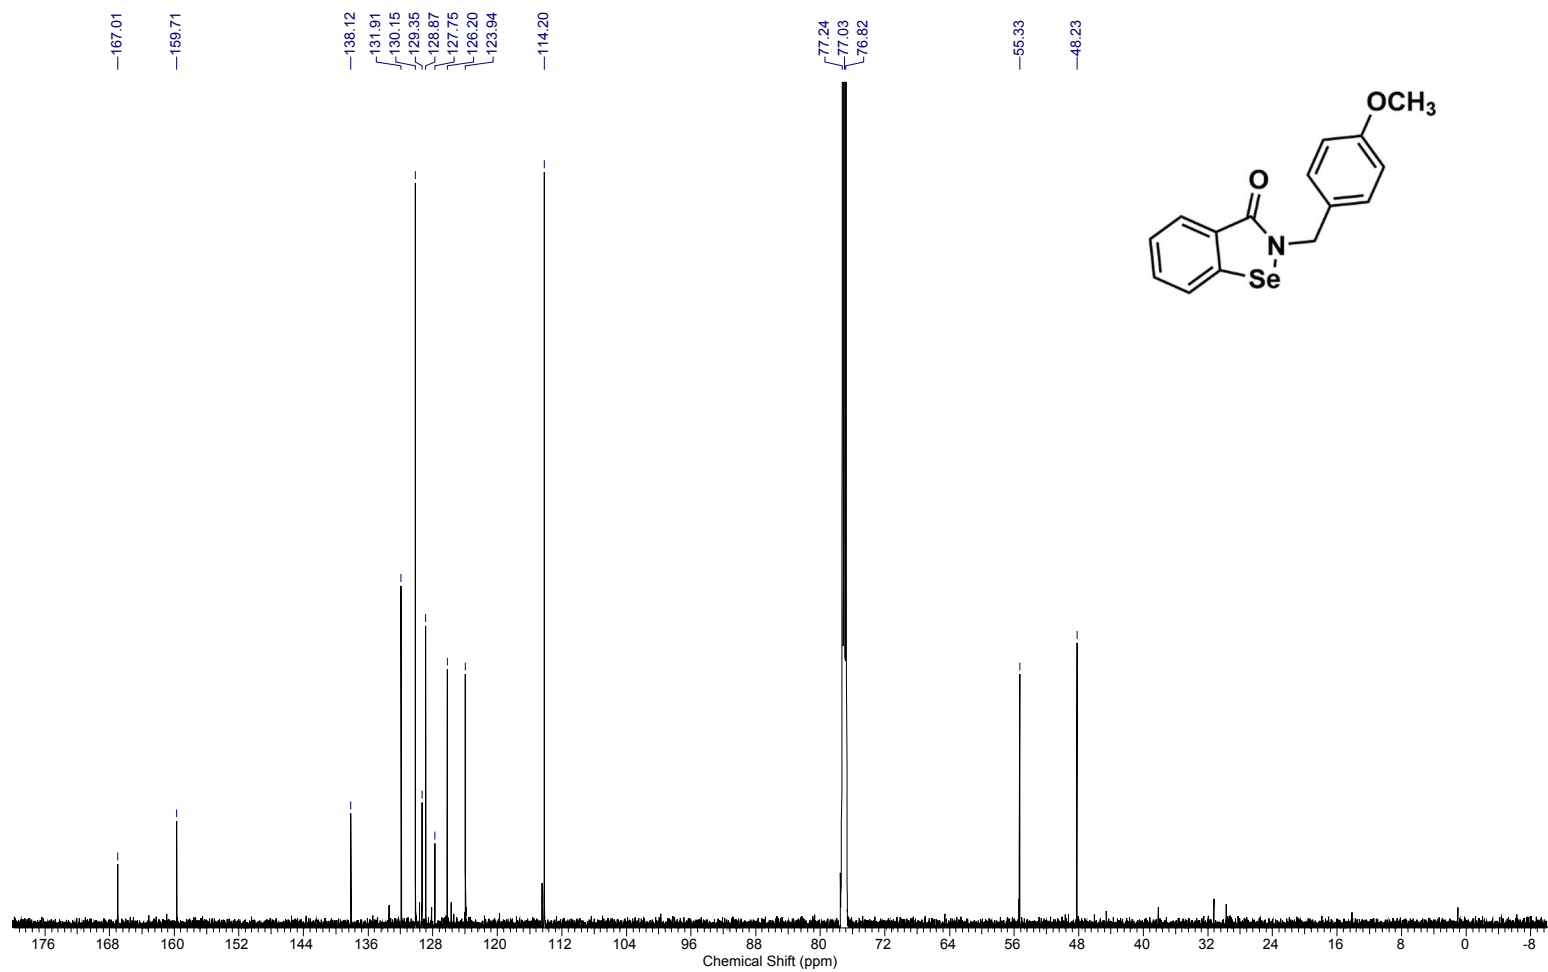

**<sup>1</sup>H-NMR of 2-(2-methoxybenzyl)benzo[d][1,2]selenazol-3(2H)-one (1c)**

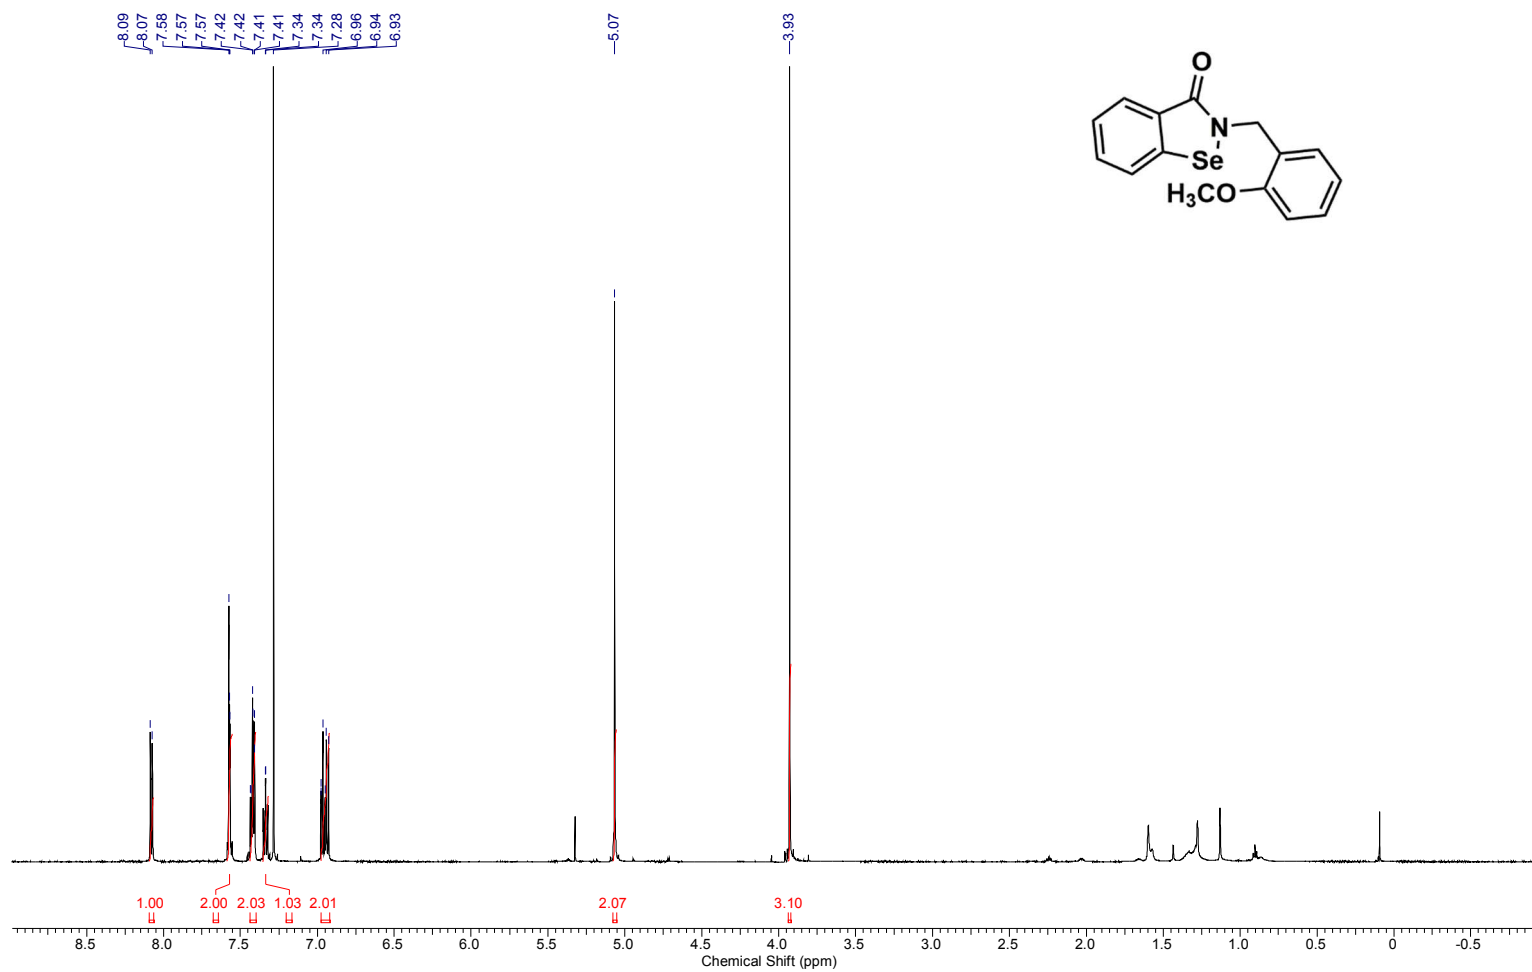

<sup>13</sup>C-NMR of 2-(2-methoxybenzyl)benzo[d][1,2]selenazol-3(2H)-one (1c)

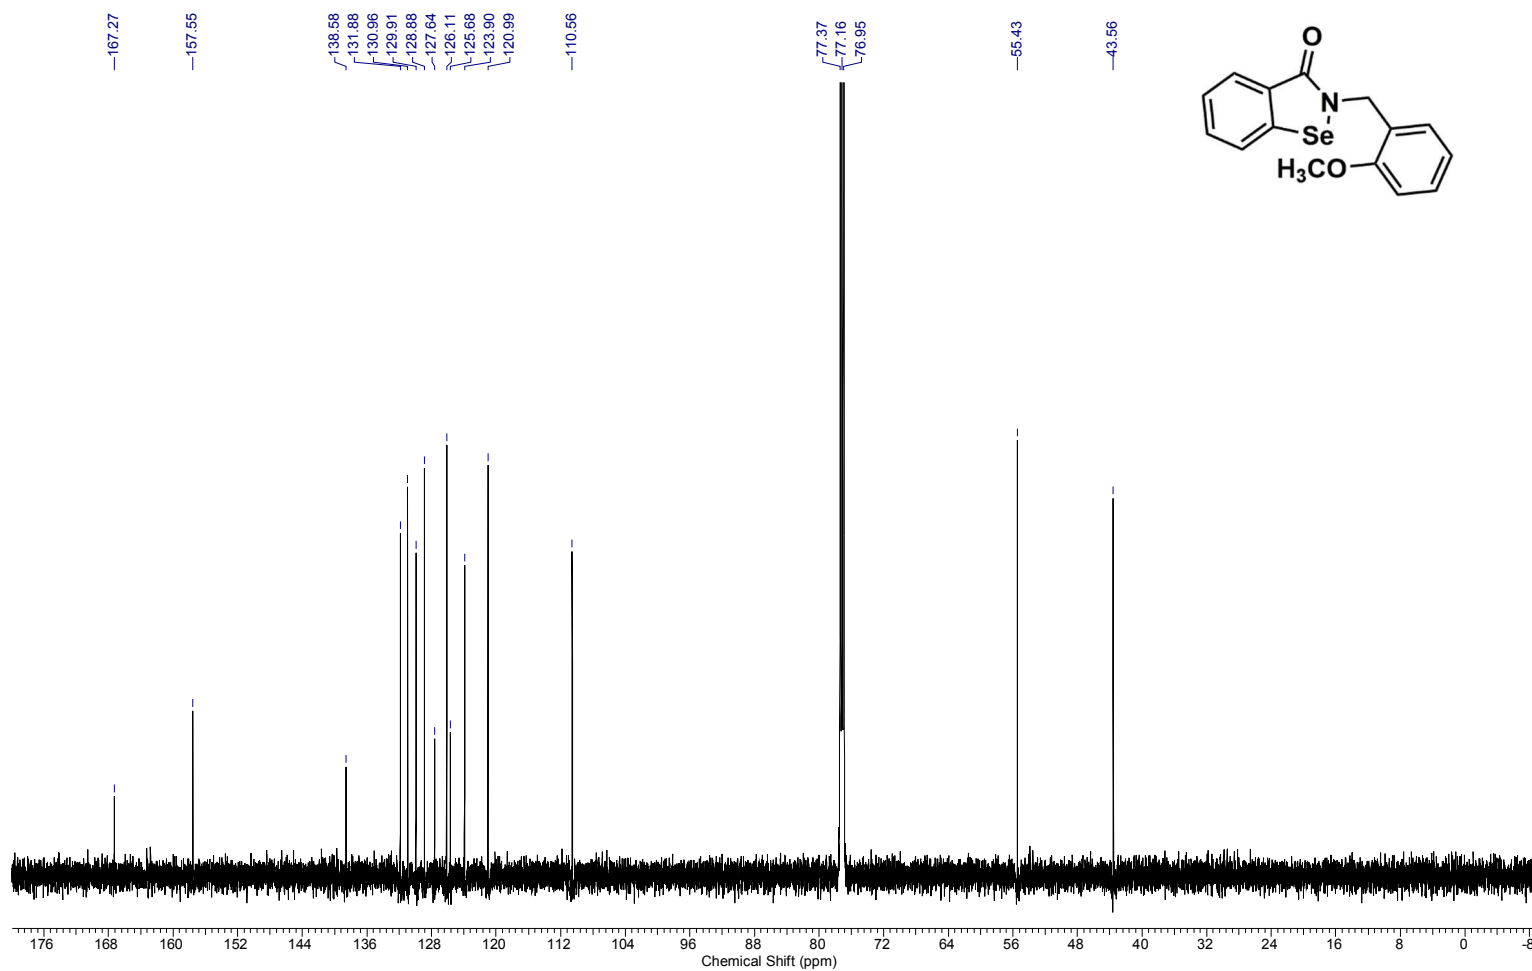

<sup>1</sup>H-NMR of 2-(4-methoxyphenyl)benzo[d][1,2]selenazol-3(2H)-one (1d)

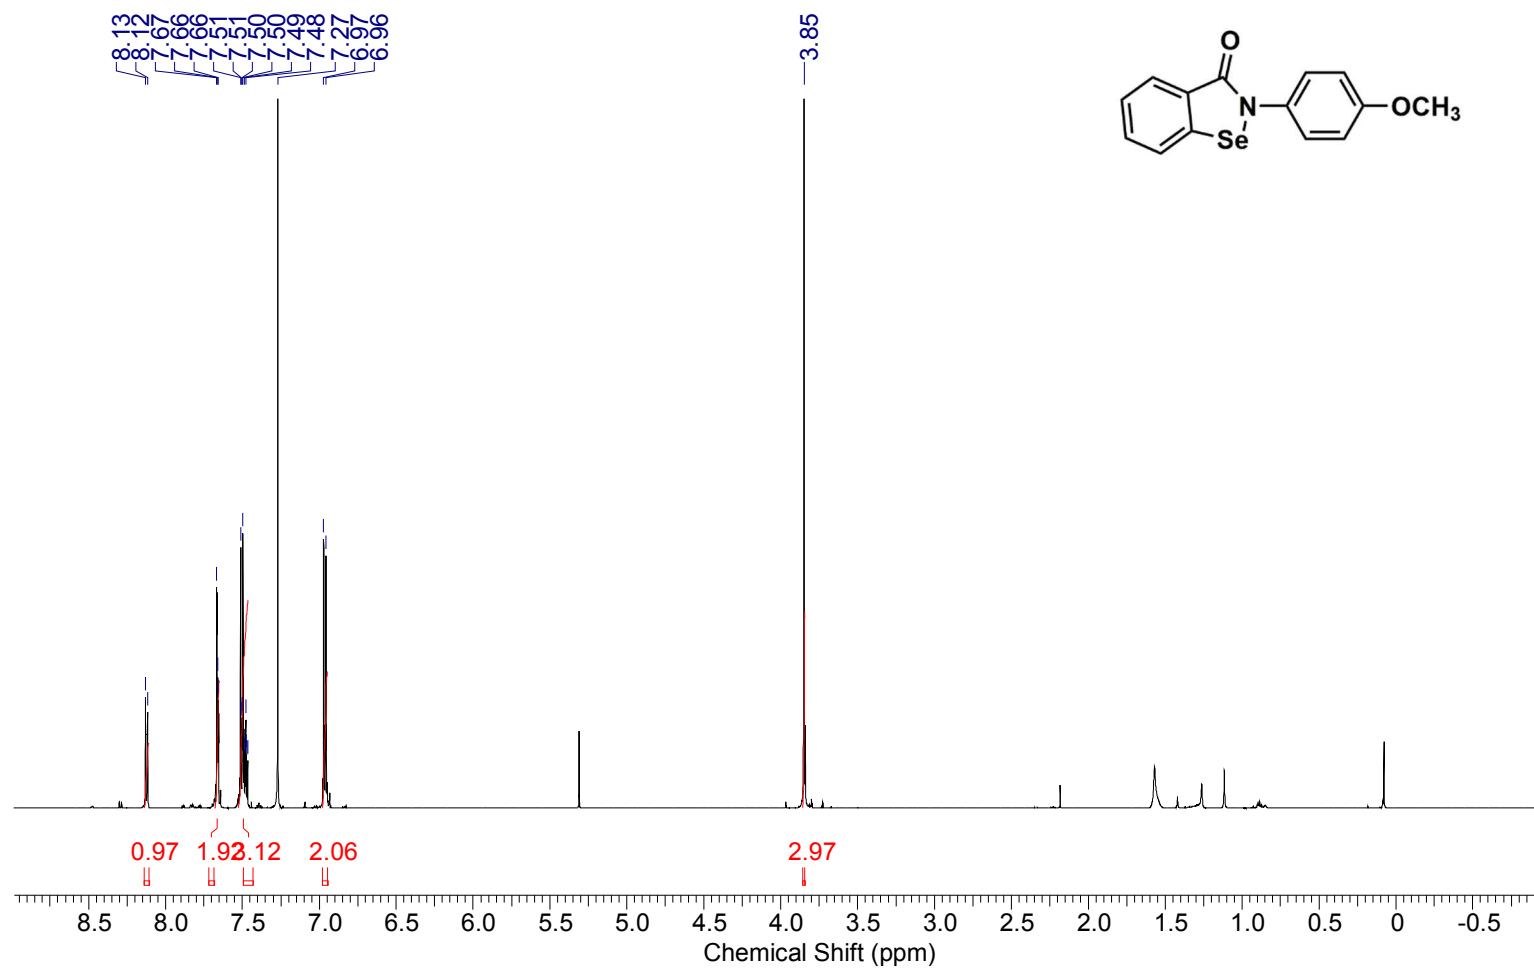



<sup>13</sup>C-NMR of 2-(4-methoxyphenyl)benzo[d][1,2]selenazol-3(2H)-one (1d)

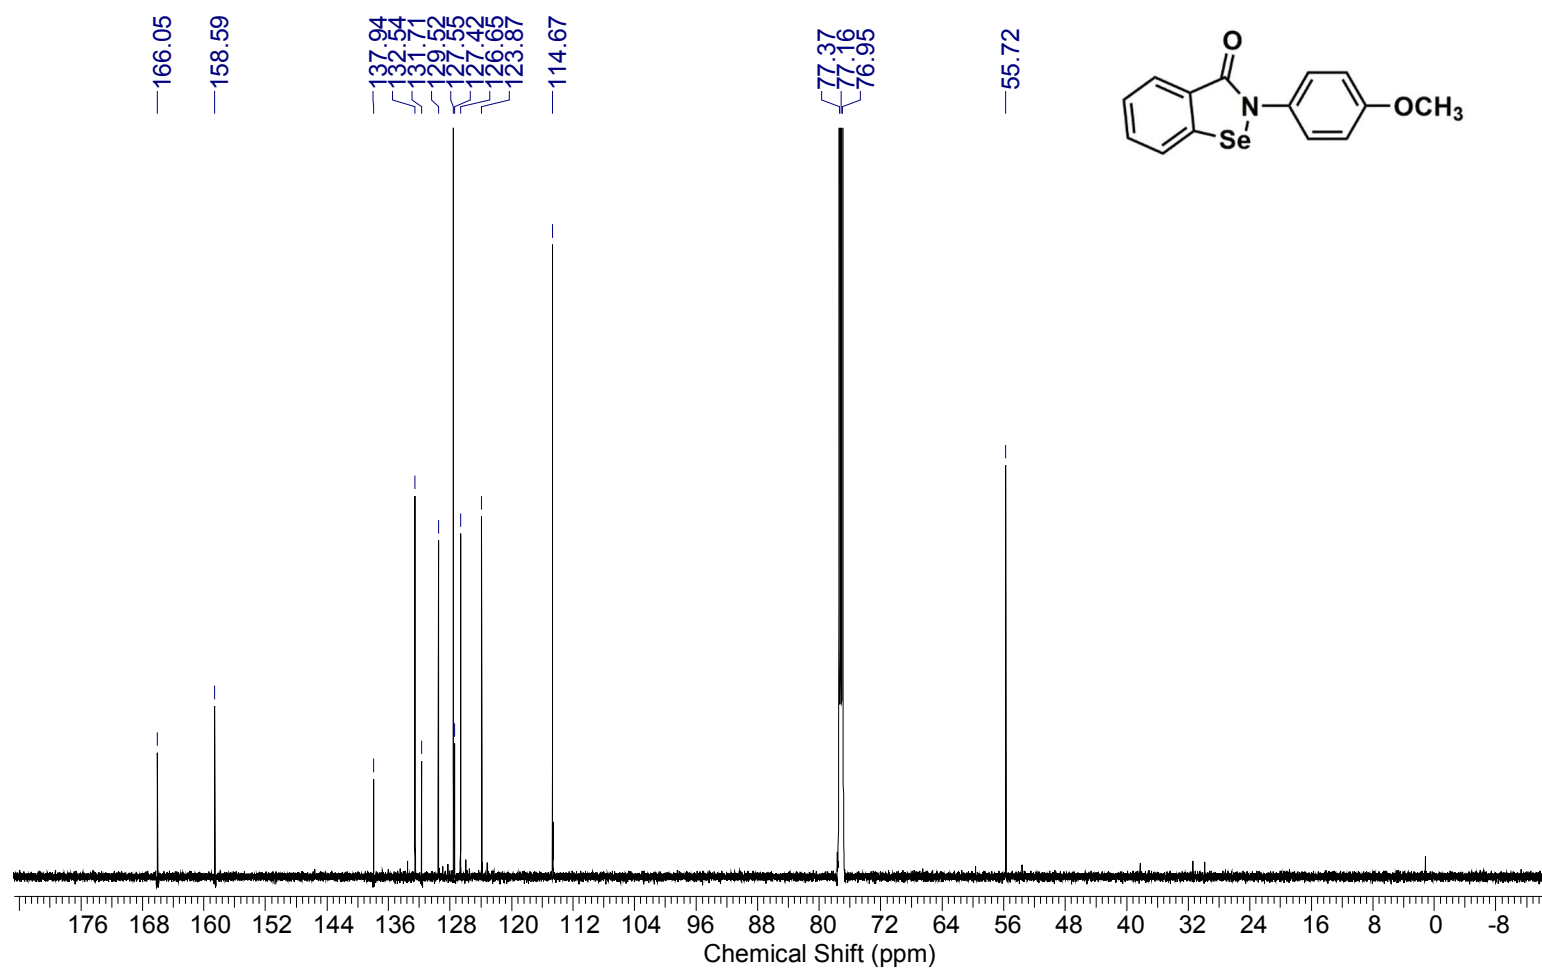

**<sup>1</sup>H-NMR of 2-benzylbenzo[d][1,2]selenazol-3(2H)-one (1e)**

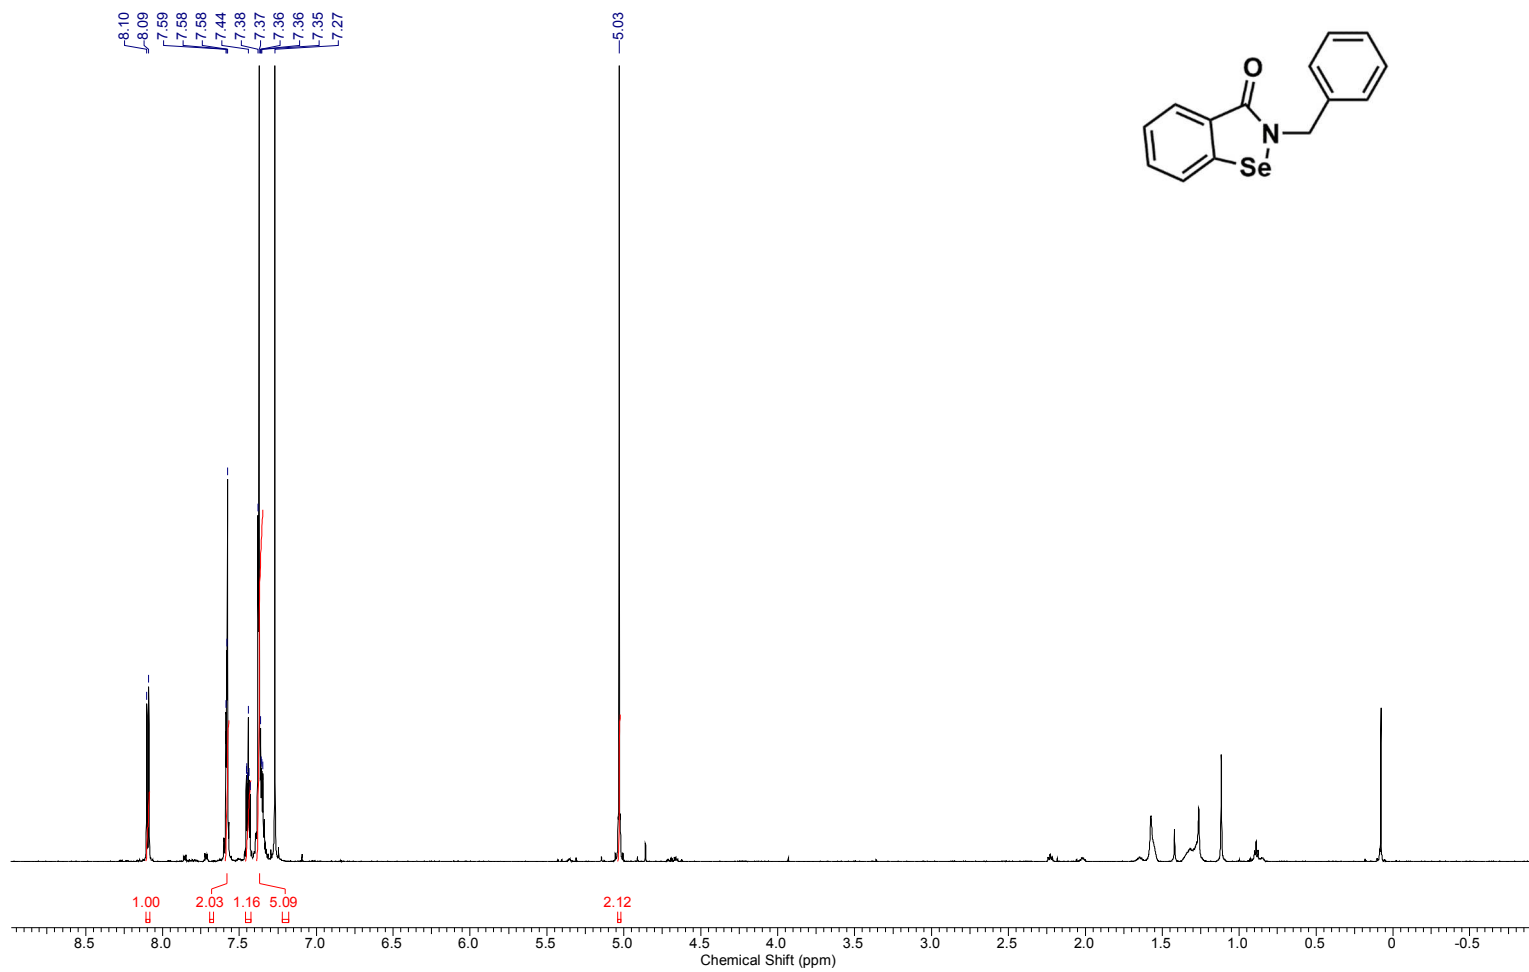

**$^{13}\text{C}$ -NMR of 2-benzylbenzo[*d*][1,2]selenazol-3(2*H*)-one (1e)**

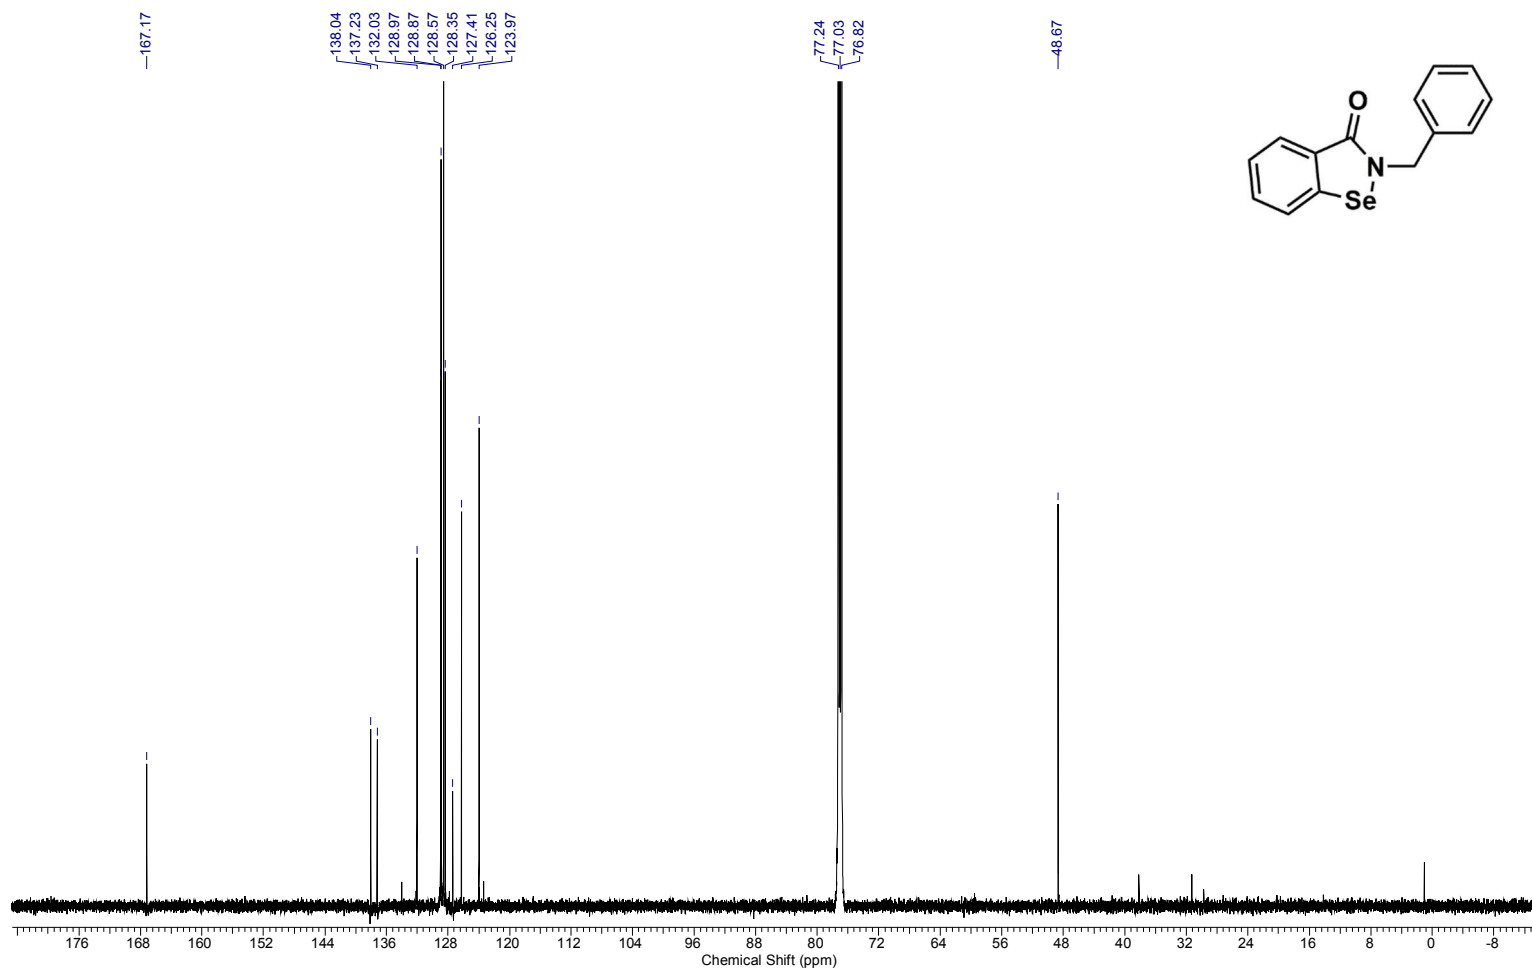

<sup>1</sup>H-NMR of 2-allylbenzo[d][1,2]selenazol-3(2H)-one (1f)

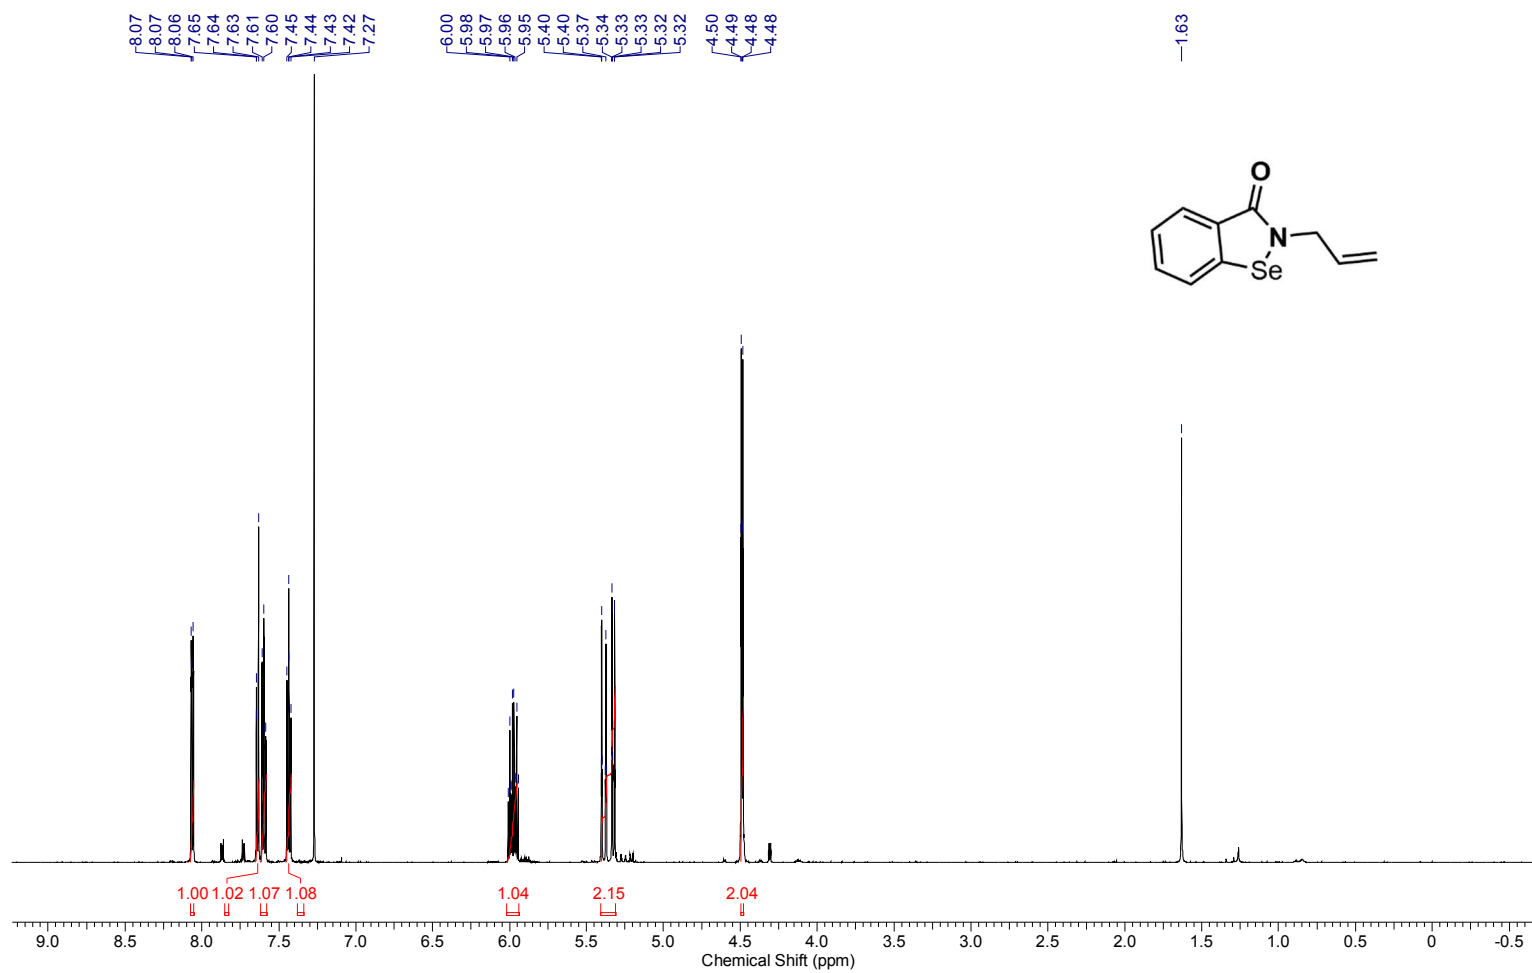

**$^{13}\text{C}$ -NMR of 2-allylbenzo[d][1,2]selenazol-3(2H)-one (1f)**

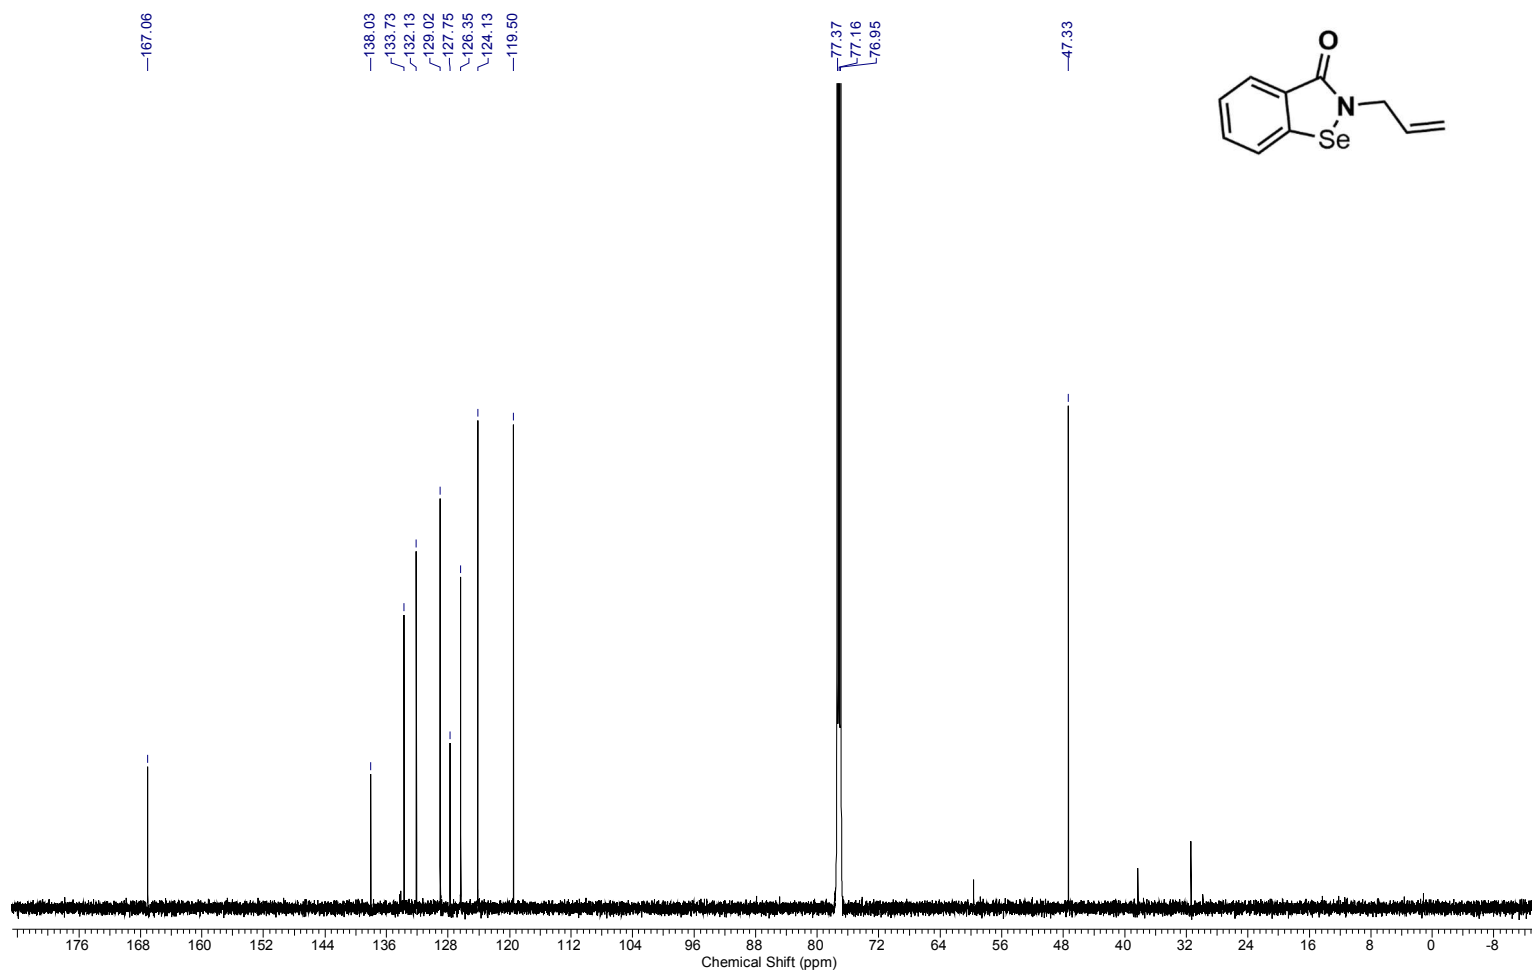

**<sup>1</sup>H-NMR of 2-(cyclohexylmethyl)benzo[d][1,2]selenazol-3(2H)-one (1g)**

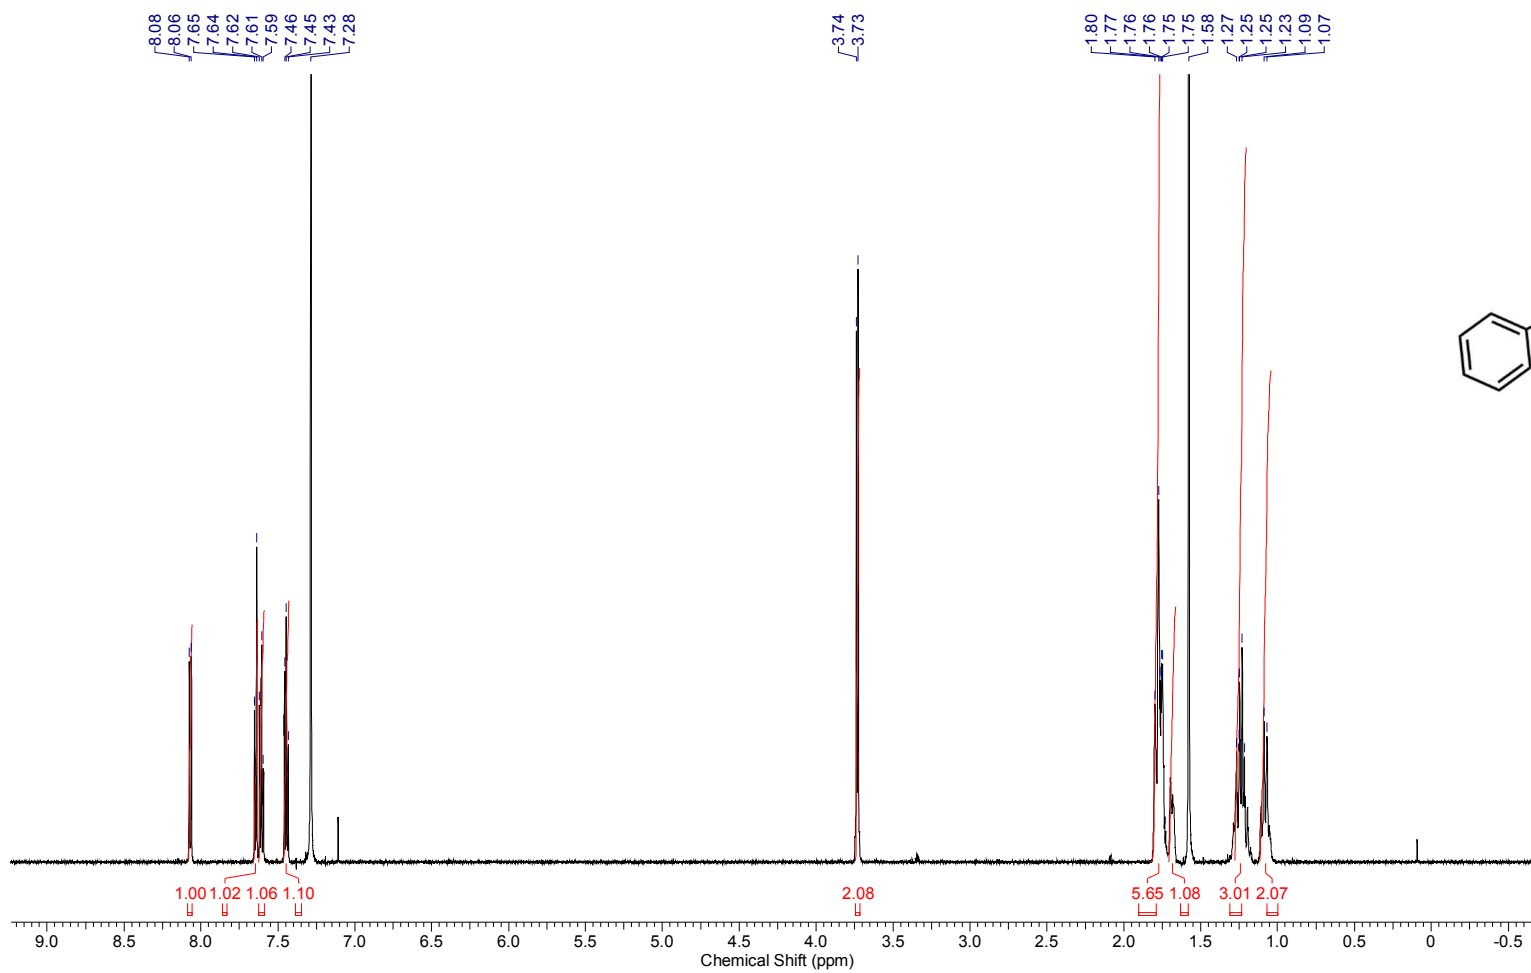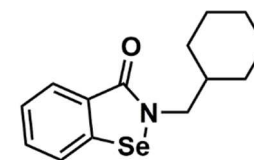

<sup>13</sup>C-NMR of 2-(cyclohexylmethyl)benzo[d][1,2]selenazol-3(2H)-one (1g)

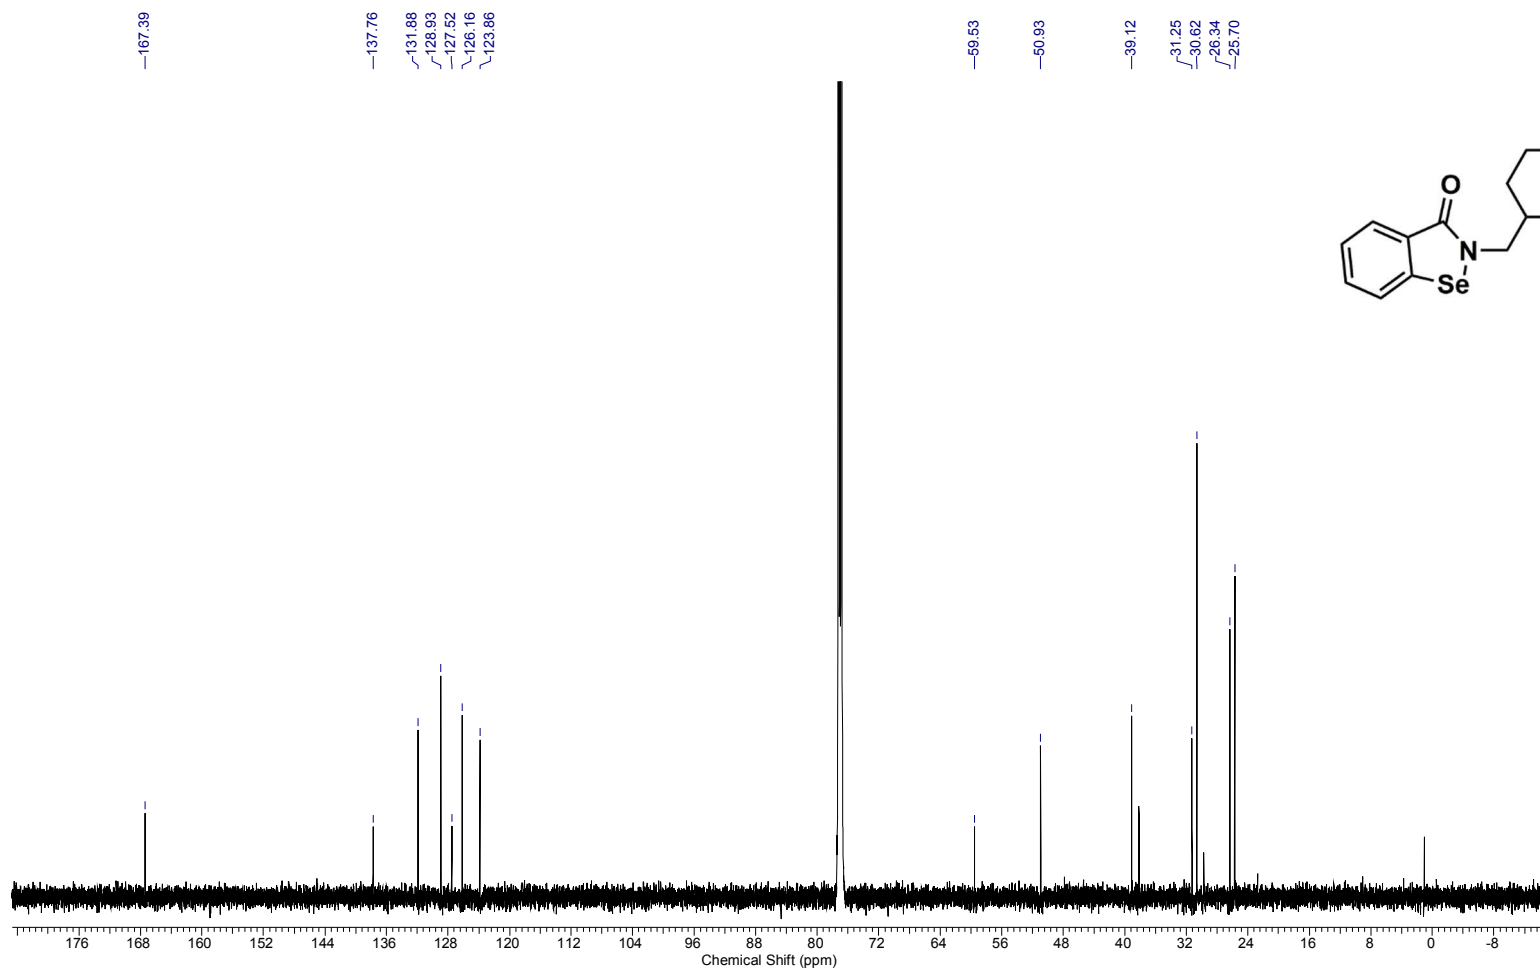

**<sup>1</sup>H-NMR of 2-(4-fluorophenyl)benzo[d][1,2]selenazol-3(2H)-one (1h)**

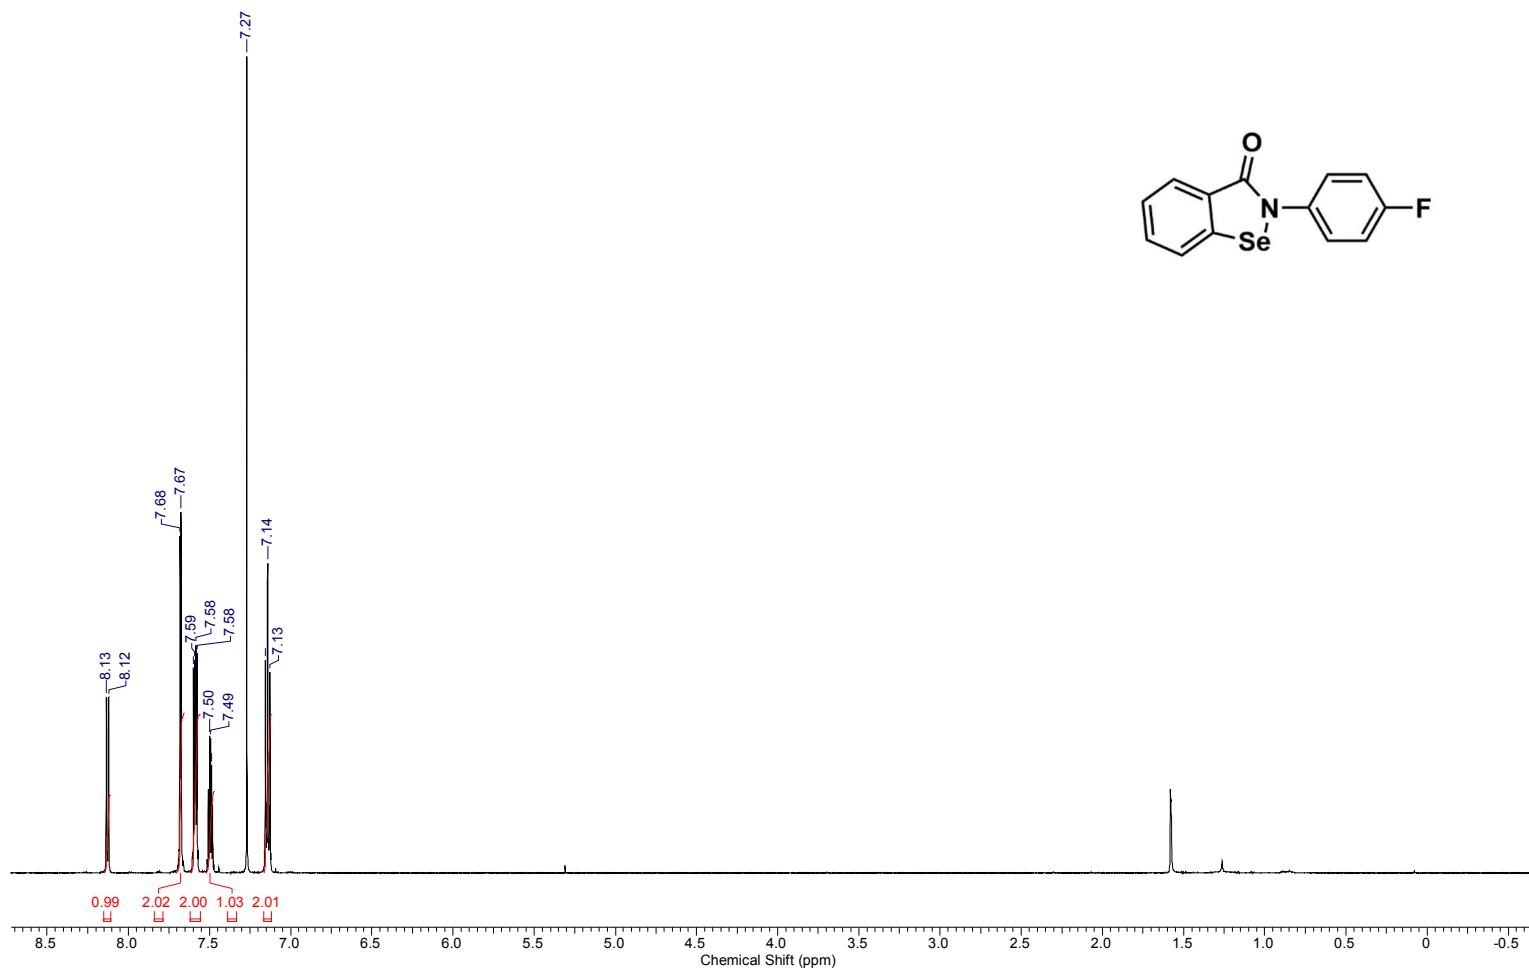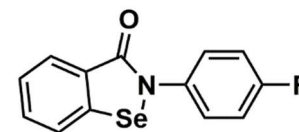



$^{13}\text{C}$ -NMR of 2-(4-fluorophenyl)benzo[d][1,2]selenazol-3(2H)-one (1h)

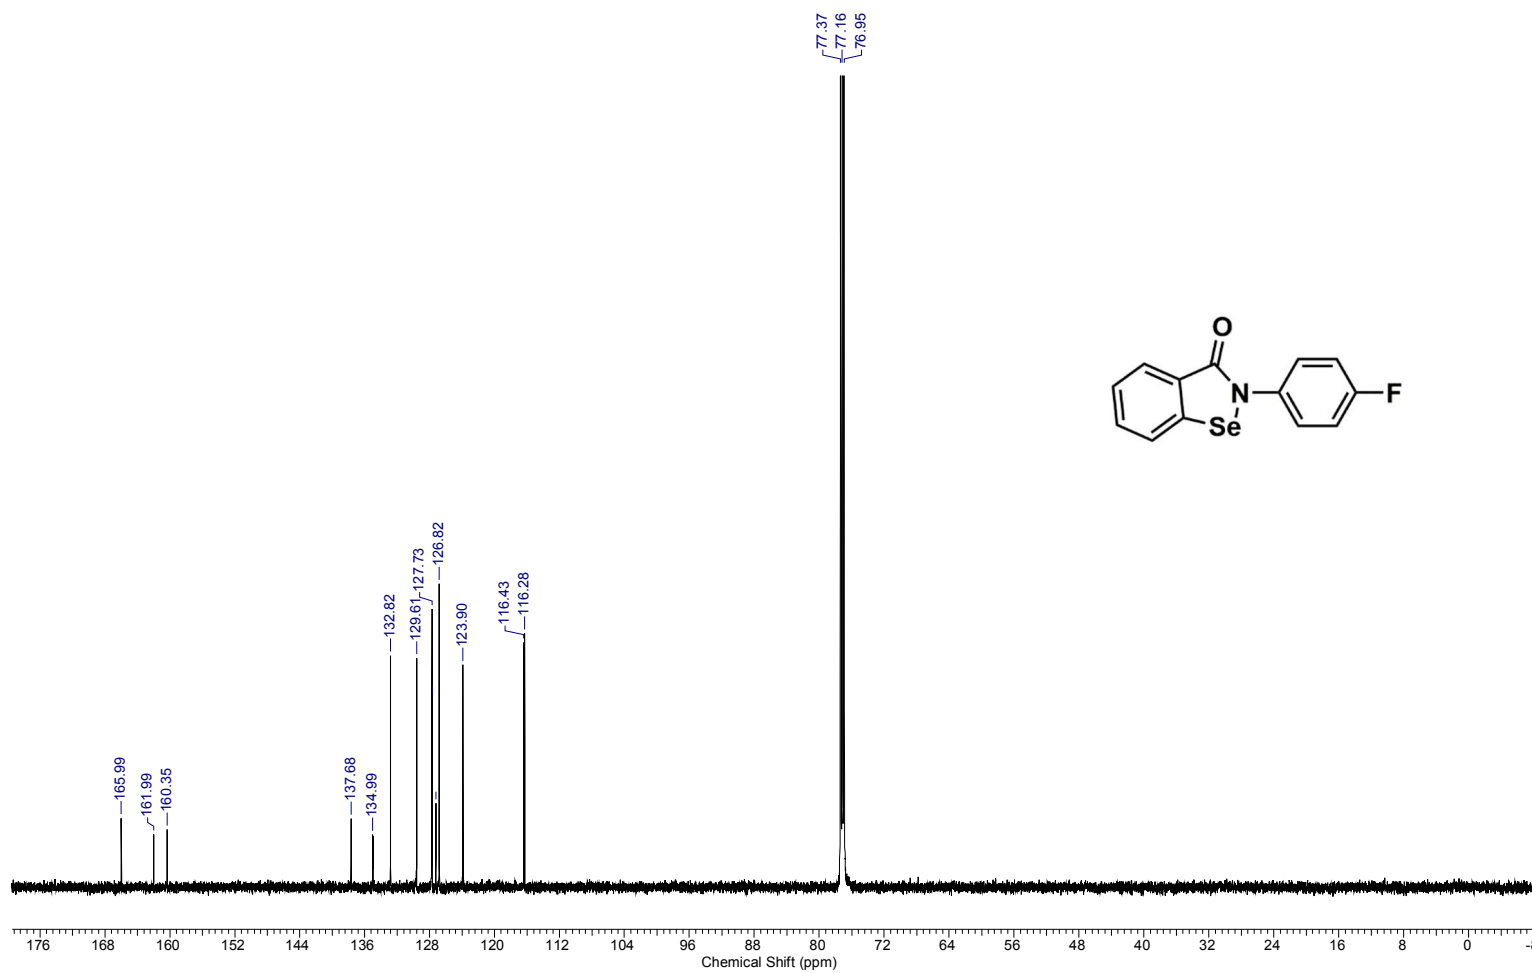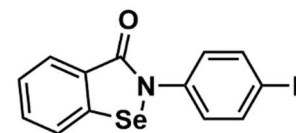

<sup>1</sup>H-NMR of 2-(2-fluorophenyl)benzo[d][1,2]selenazol-3(2H)-one (1i)

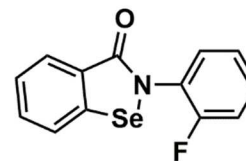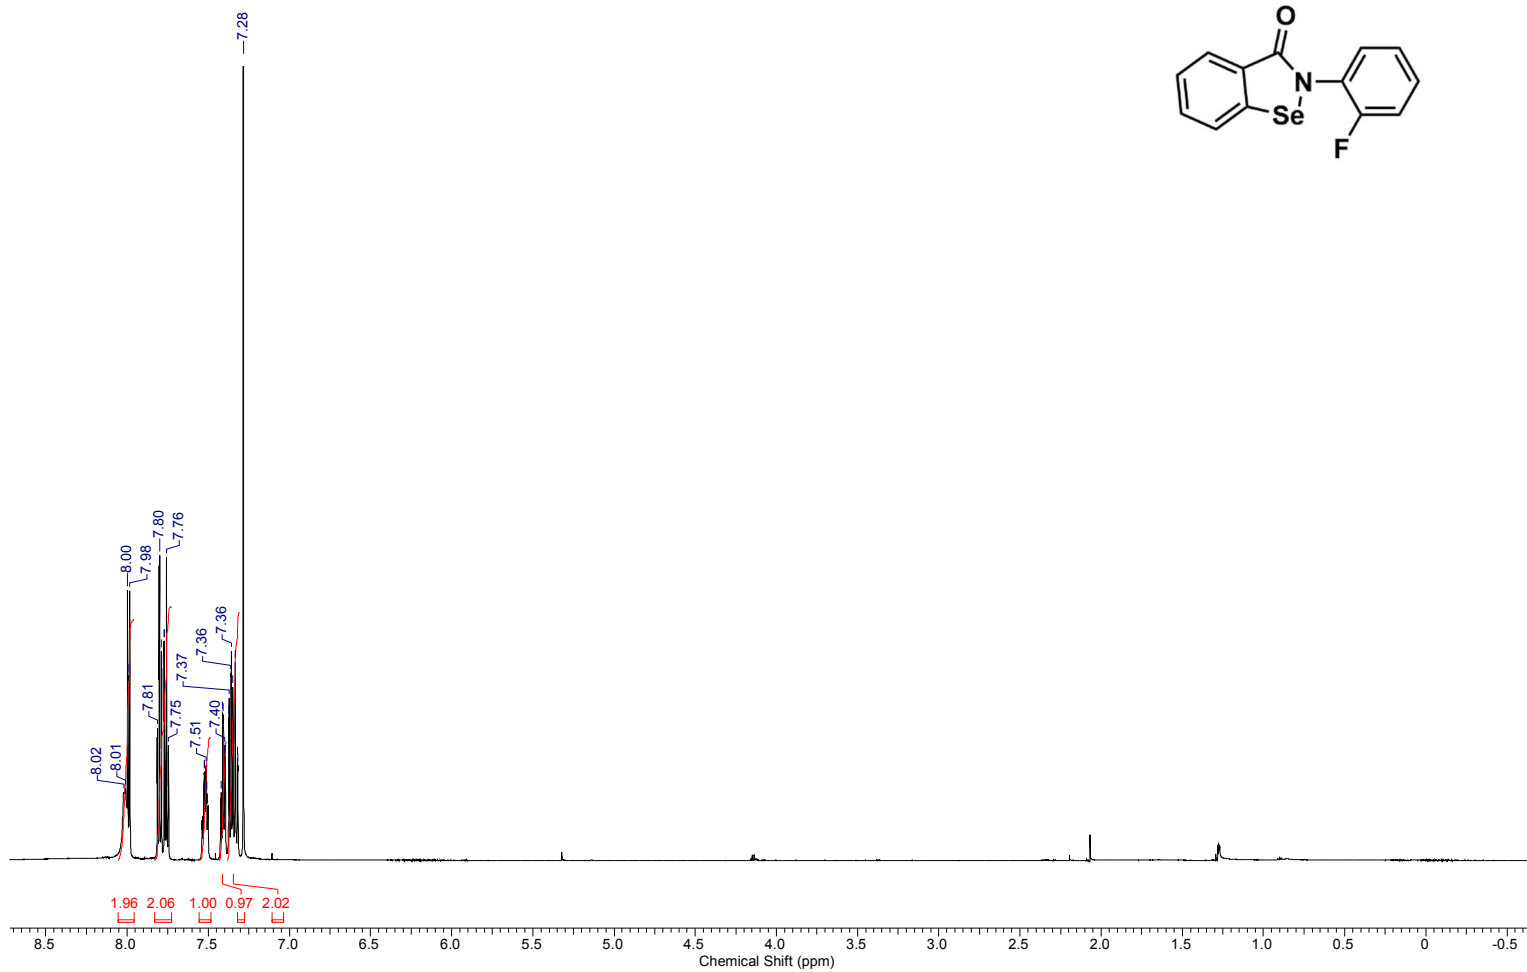

<sup>13</sup>C-NMR of 2-(2-fluorophenyl)benzo[d][1,2]selenazol-3(2H)-one (1i)

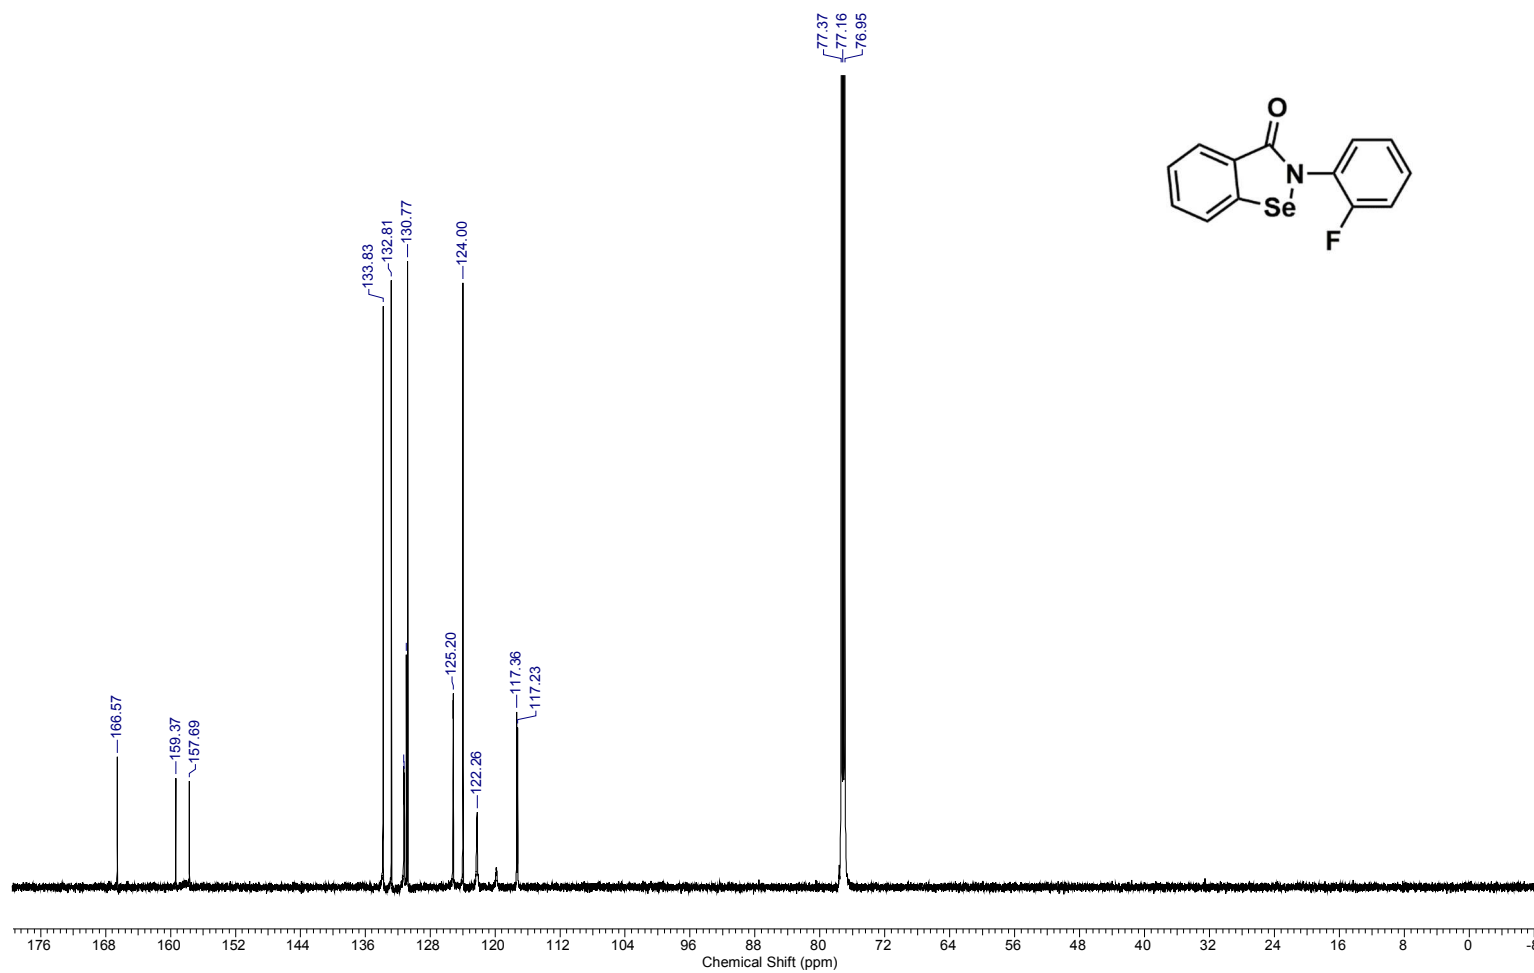

<sup>1</sup>H-NMR of 2-(4-azidophenyl)benzo[d][1,2]selenazol-3(2H)-one (1j)

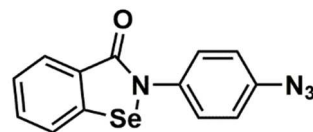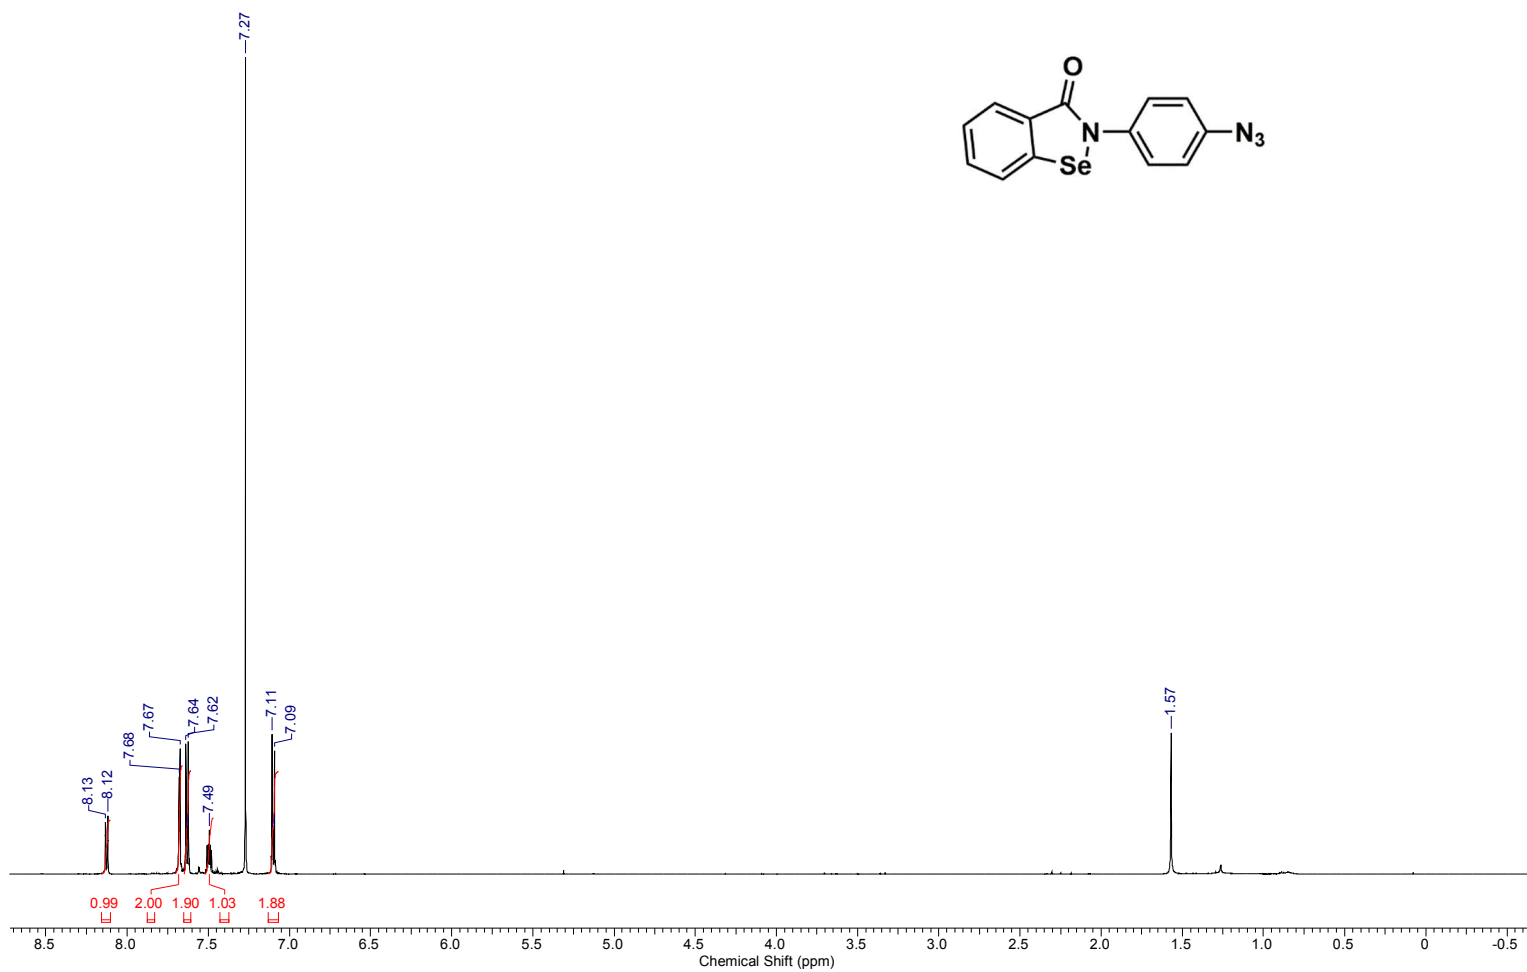

$^{13}\text{C}$ -NMR of 2-(4-azidophenyl)benzo[d][1,2]selenazol-3(2H)-one (1j)

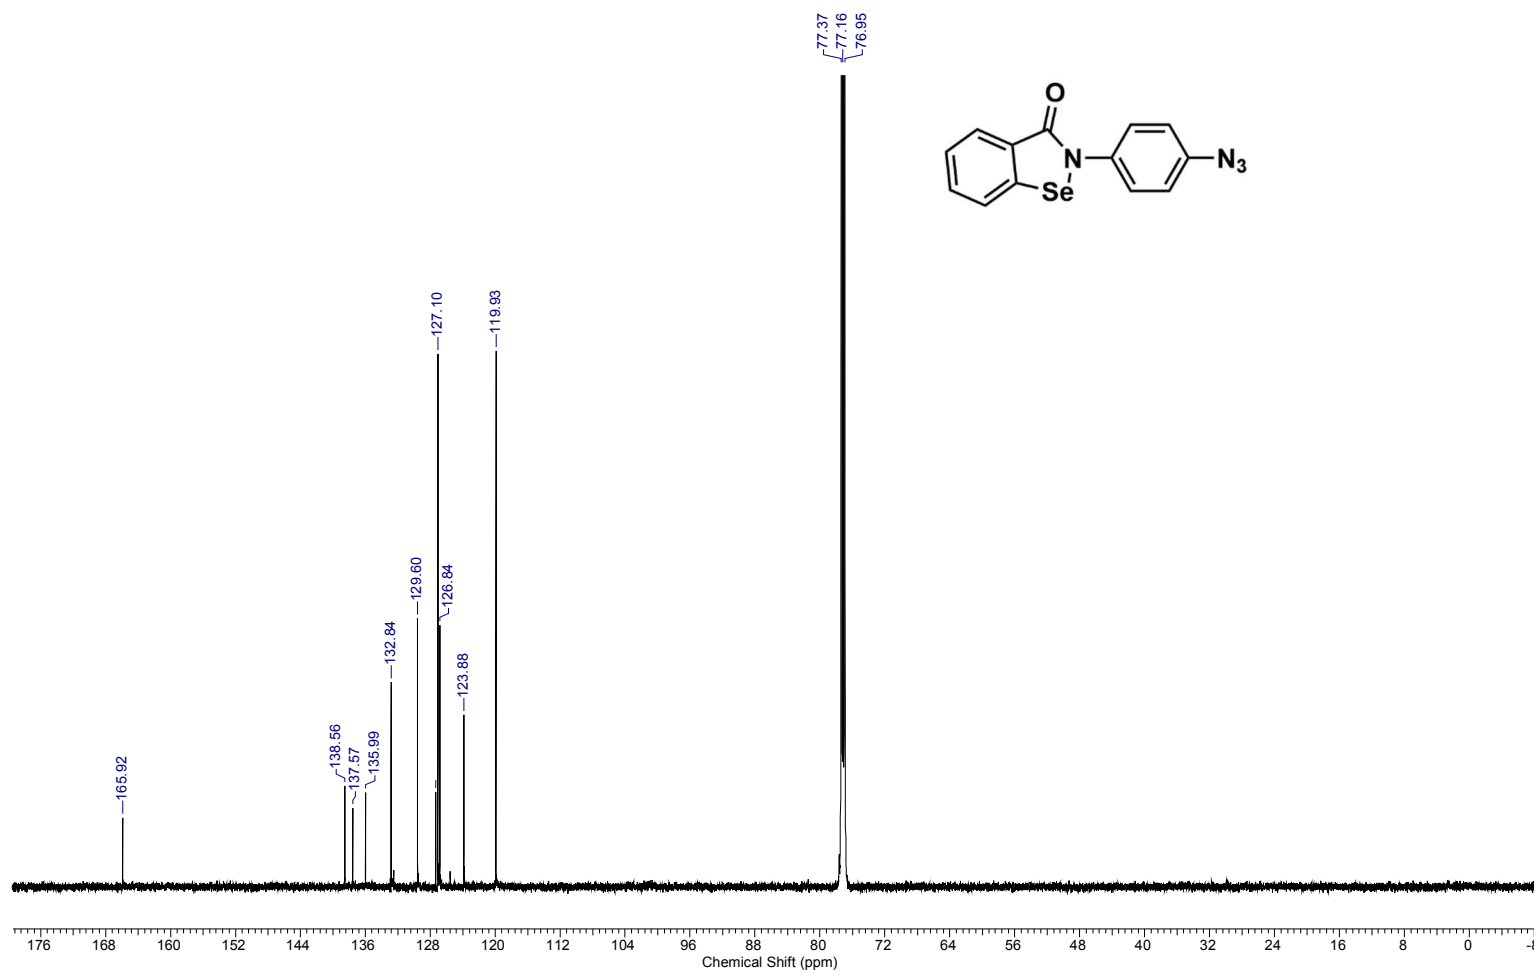

<sup>1</sup>H-NMR of 2-(*tert*-butyl)benzo[*d*][1,2]selenazol-3(2*H*)-one (1k)

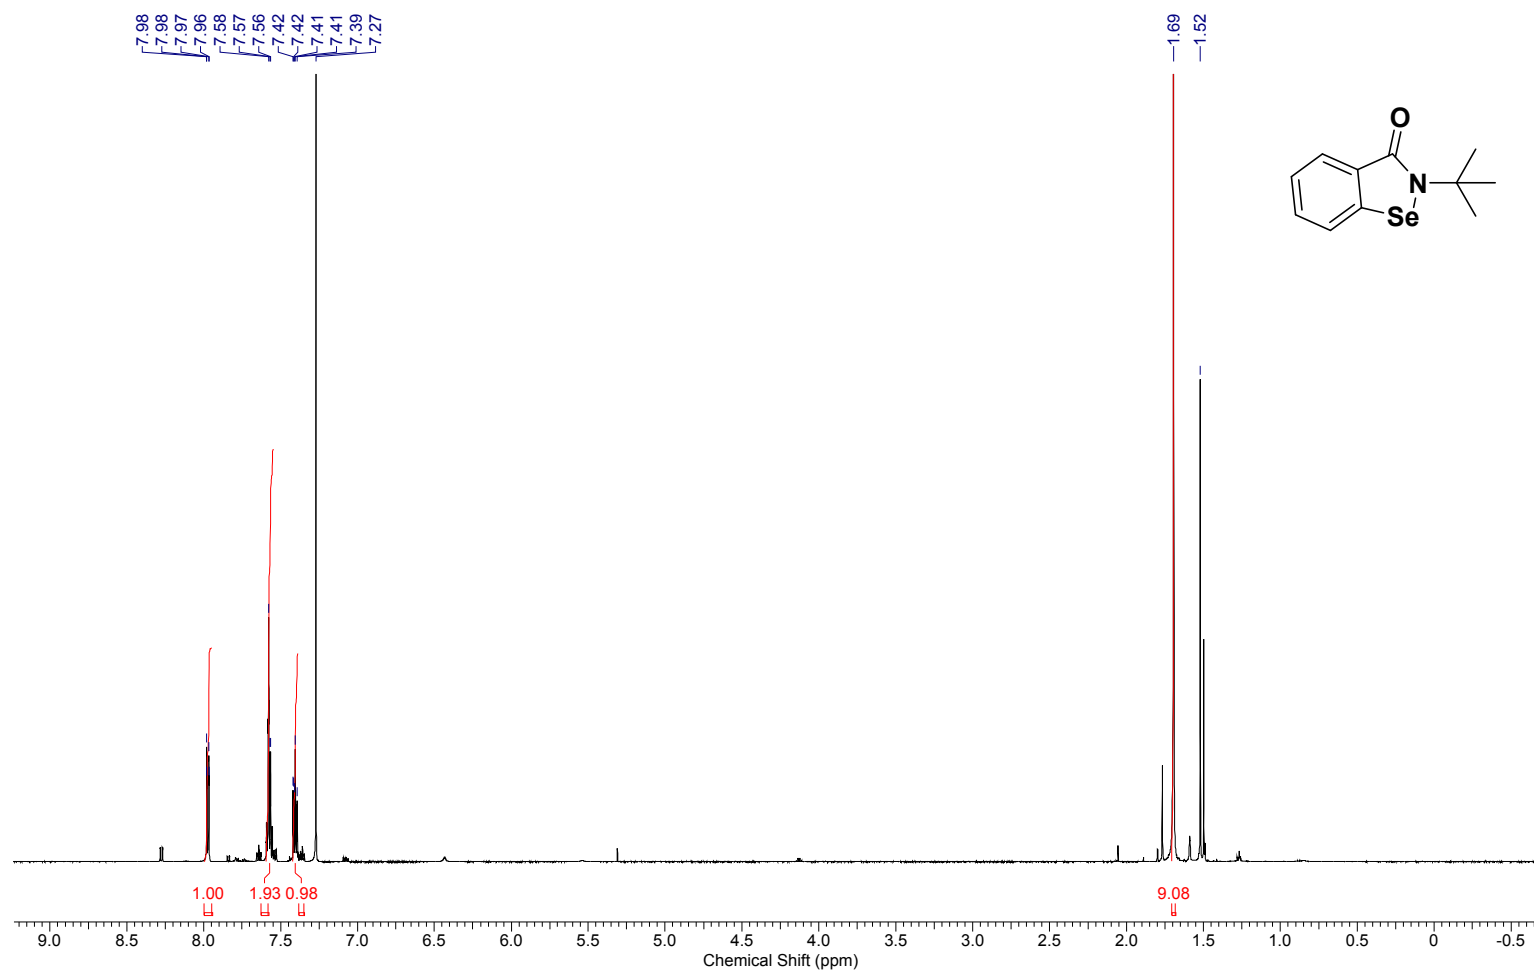

<sup>13</sup>C-NMR of 2-(*tert*-butyl)benzo[*d*][1,2]selenazol-3(2*H*)-one (1k)

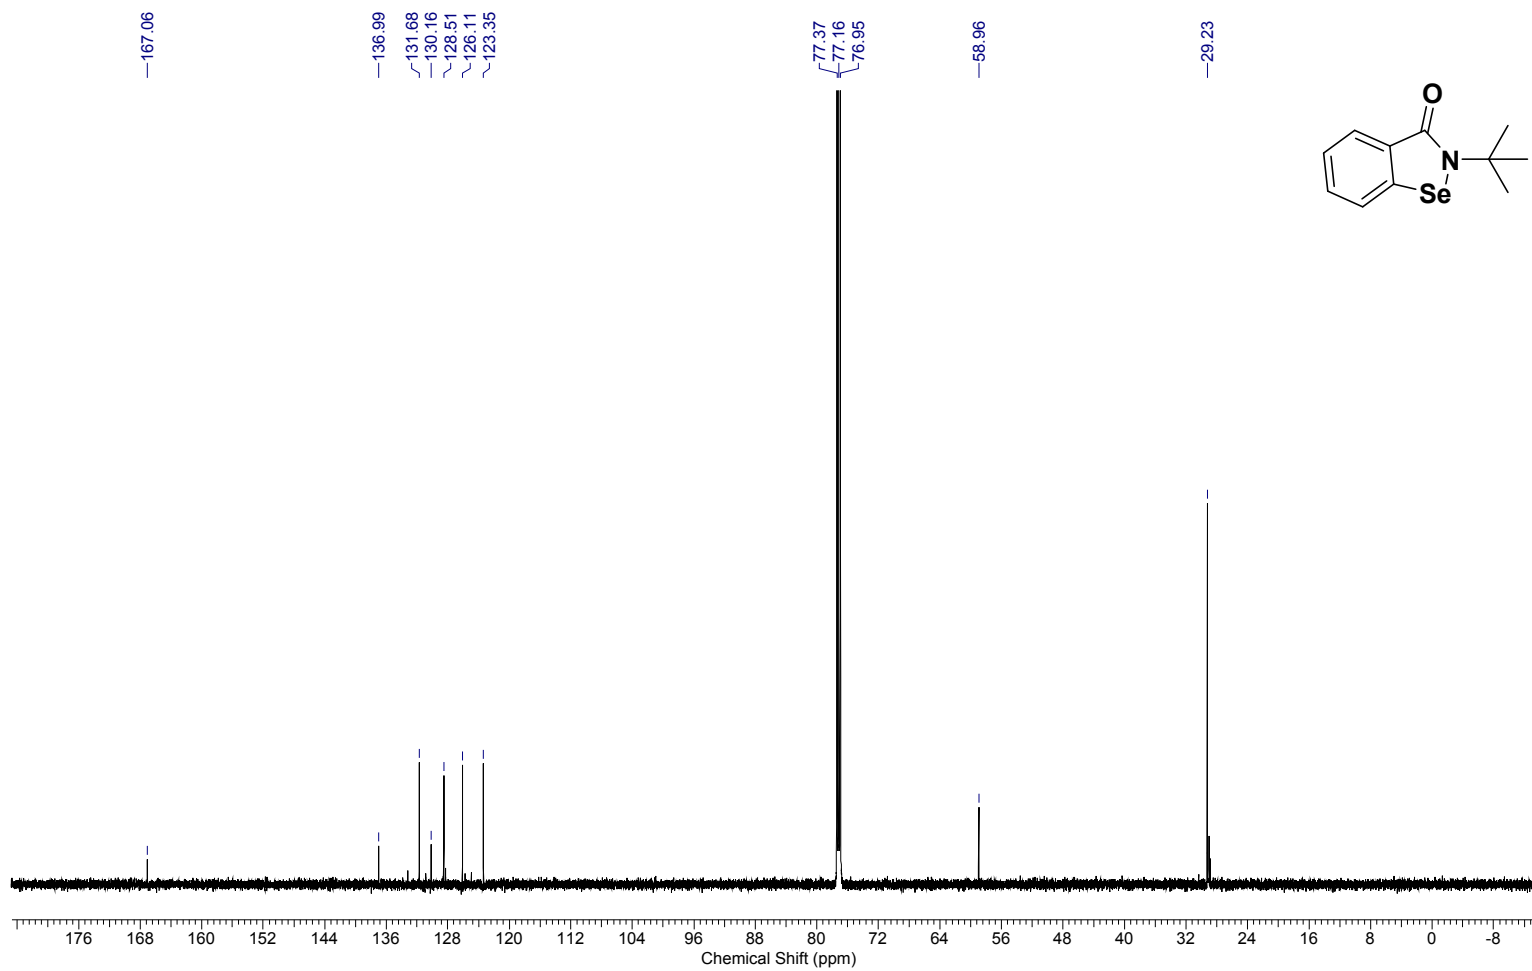

**<sup>1</sup>H-NMR of 2-((3*R*,5*S*)-adamantan-1-yl)benzo[*d*][1,2]selenazol-3(2*H*)-one (1l)**

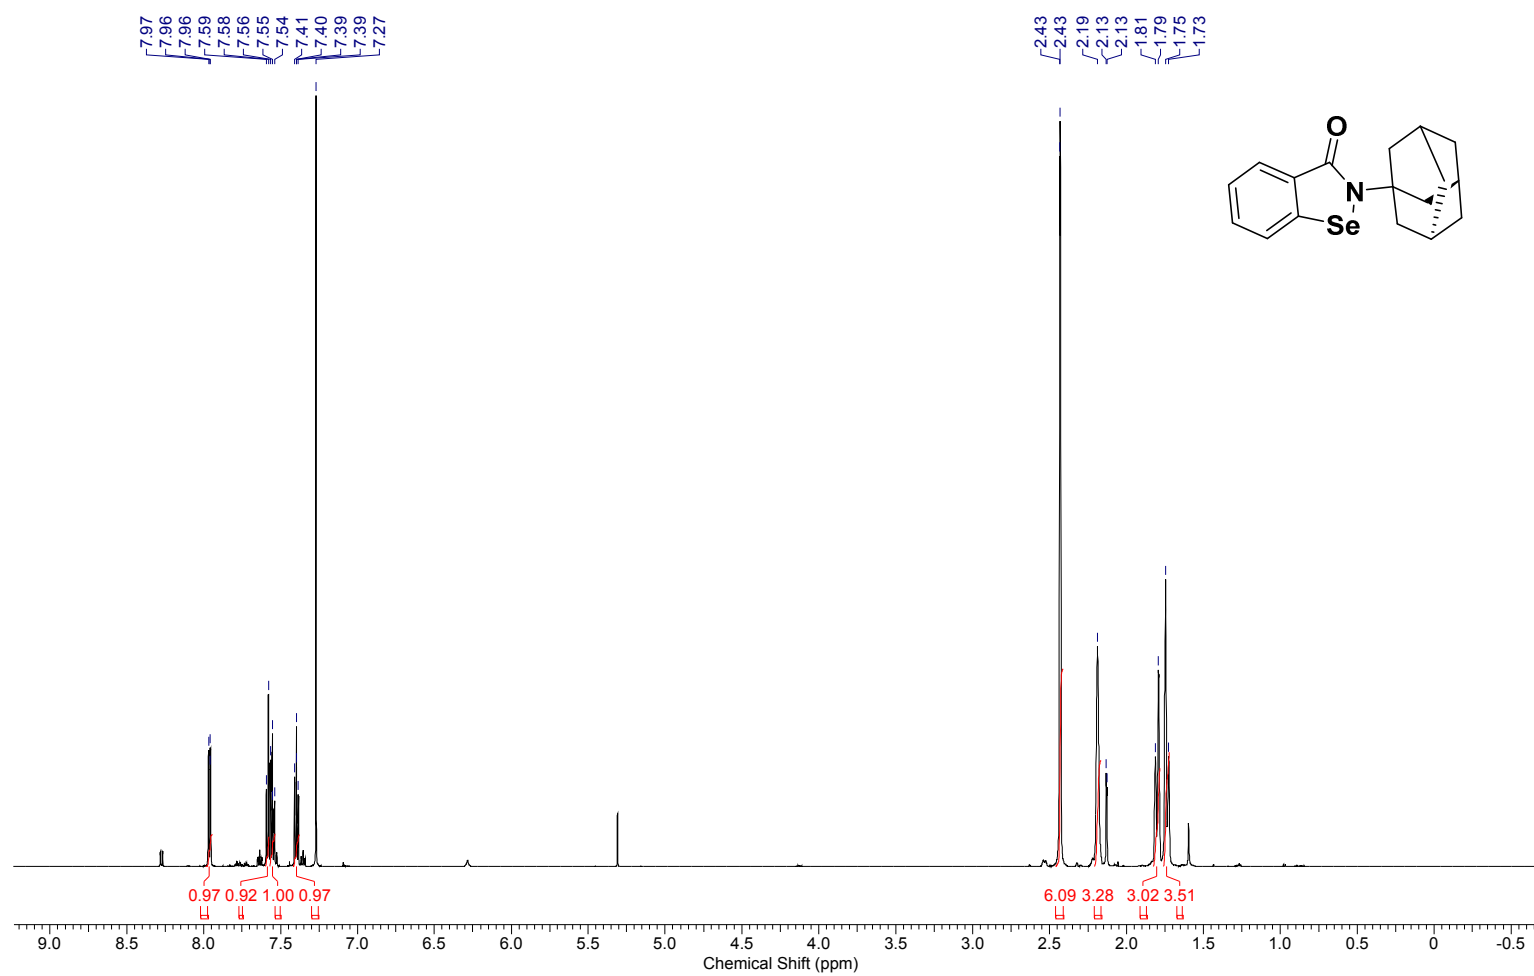



<sup>13</sup>C-NMR of 2-((3*R*,5*S*)-adamantan-1-yl)benzo[*d*][1,2]selenazol-3(2*H*)-one (11)

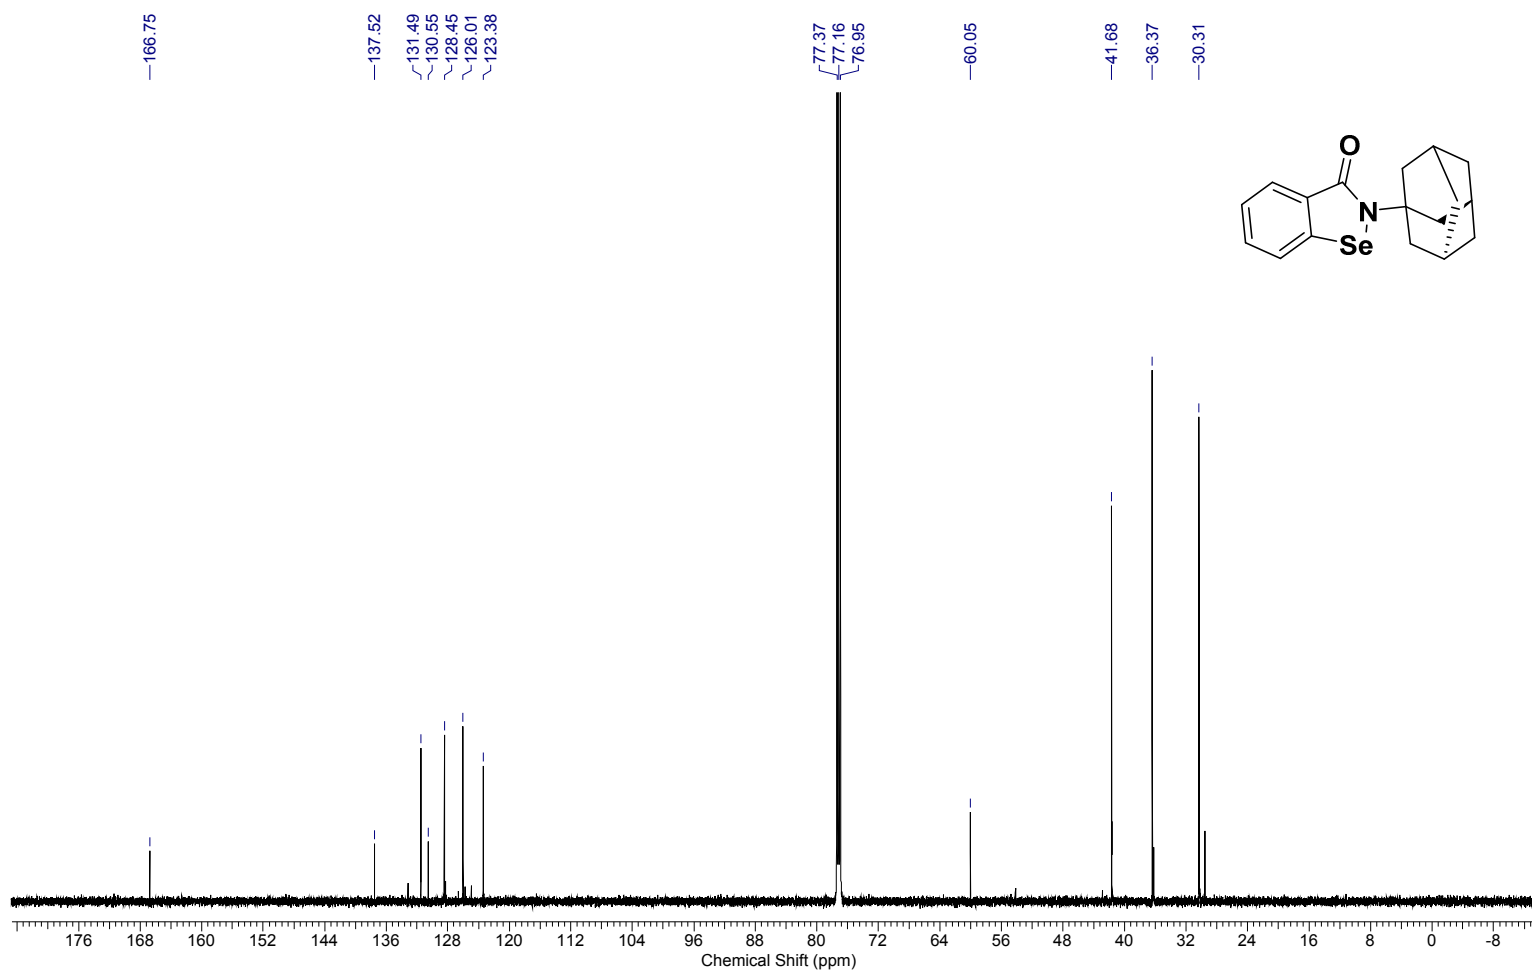

**<sup>1</sup>H-NMR of 2-cyclopentylbenzo[d][1,2]selenazol-3(2H)-one (1m)**

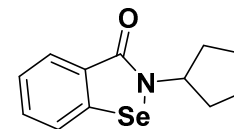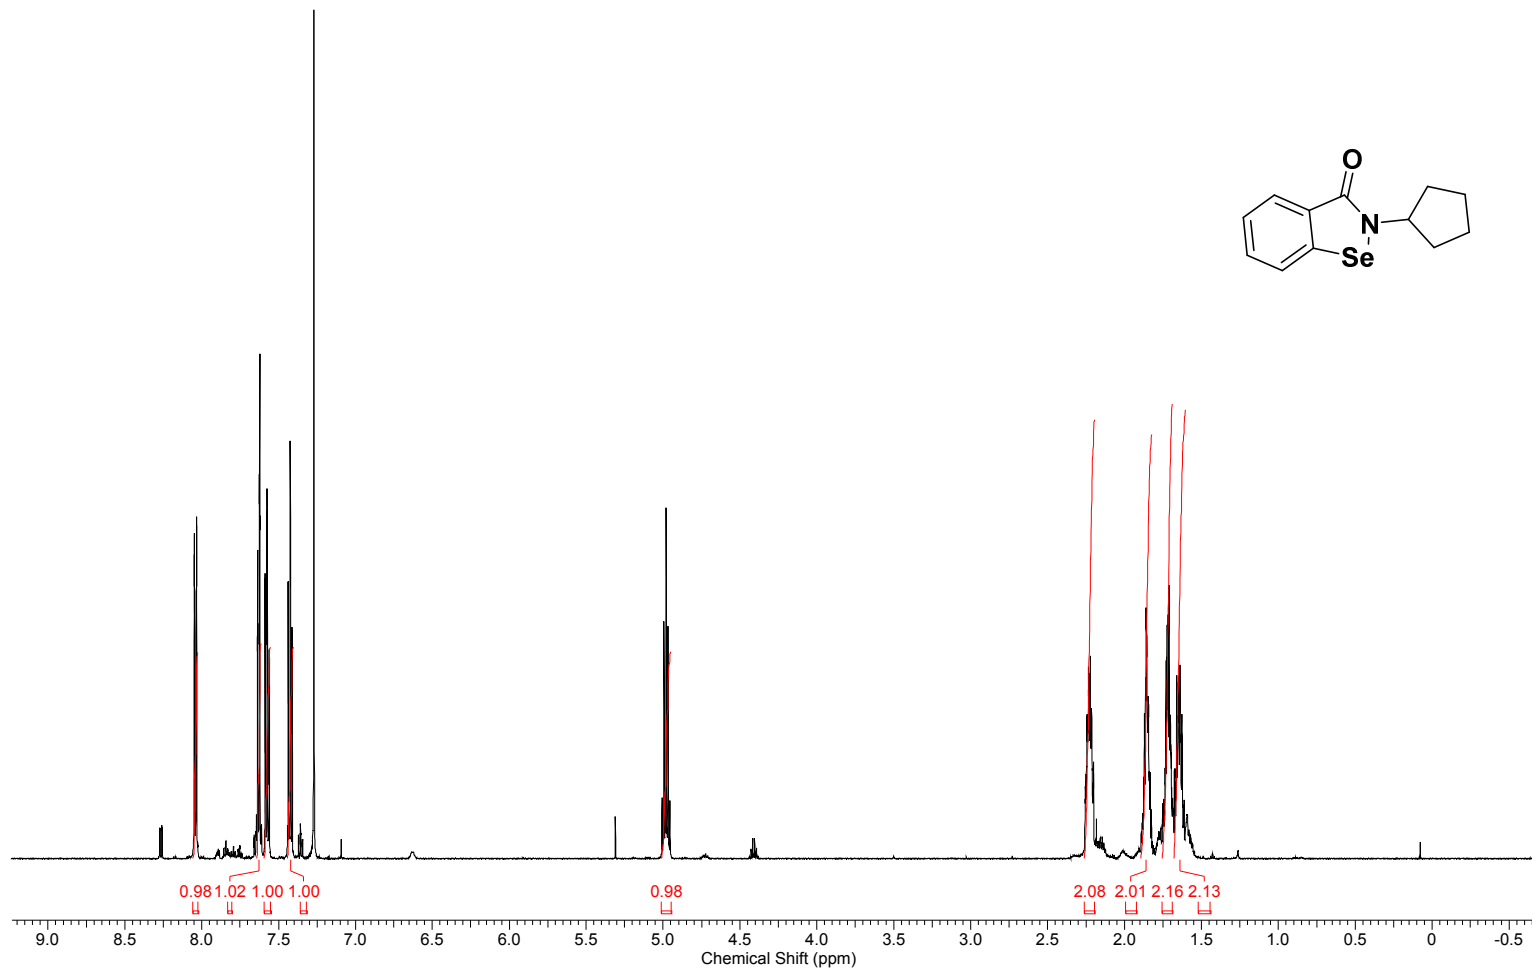

<sup>13</sup>C-NMR of 2-cyclopentylbenzo[d][1,2]selenazol-3(2H)-one (1m)

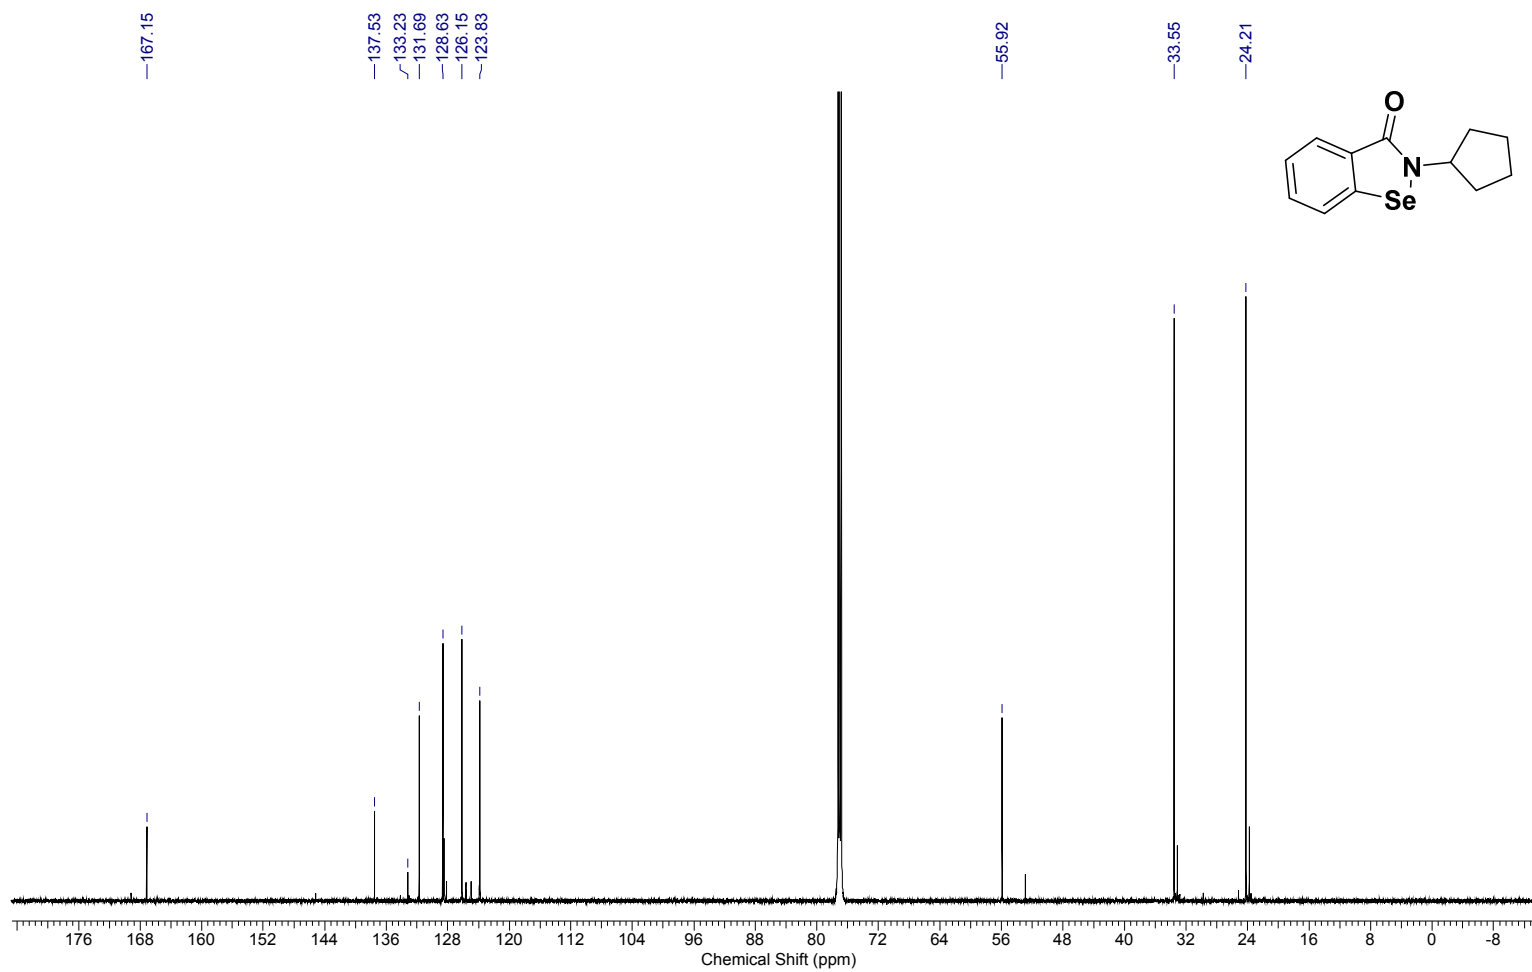

**<sup>1</sup>H-NMR of 2-cyclohexylbenzo[d][1,2]selenazol-3(2H)-one (1n)**

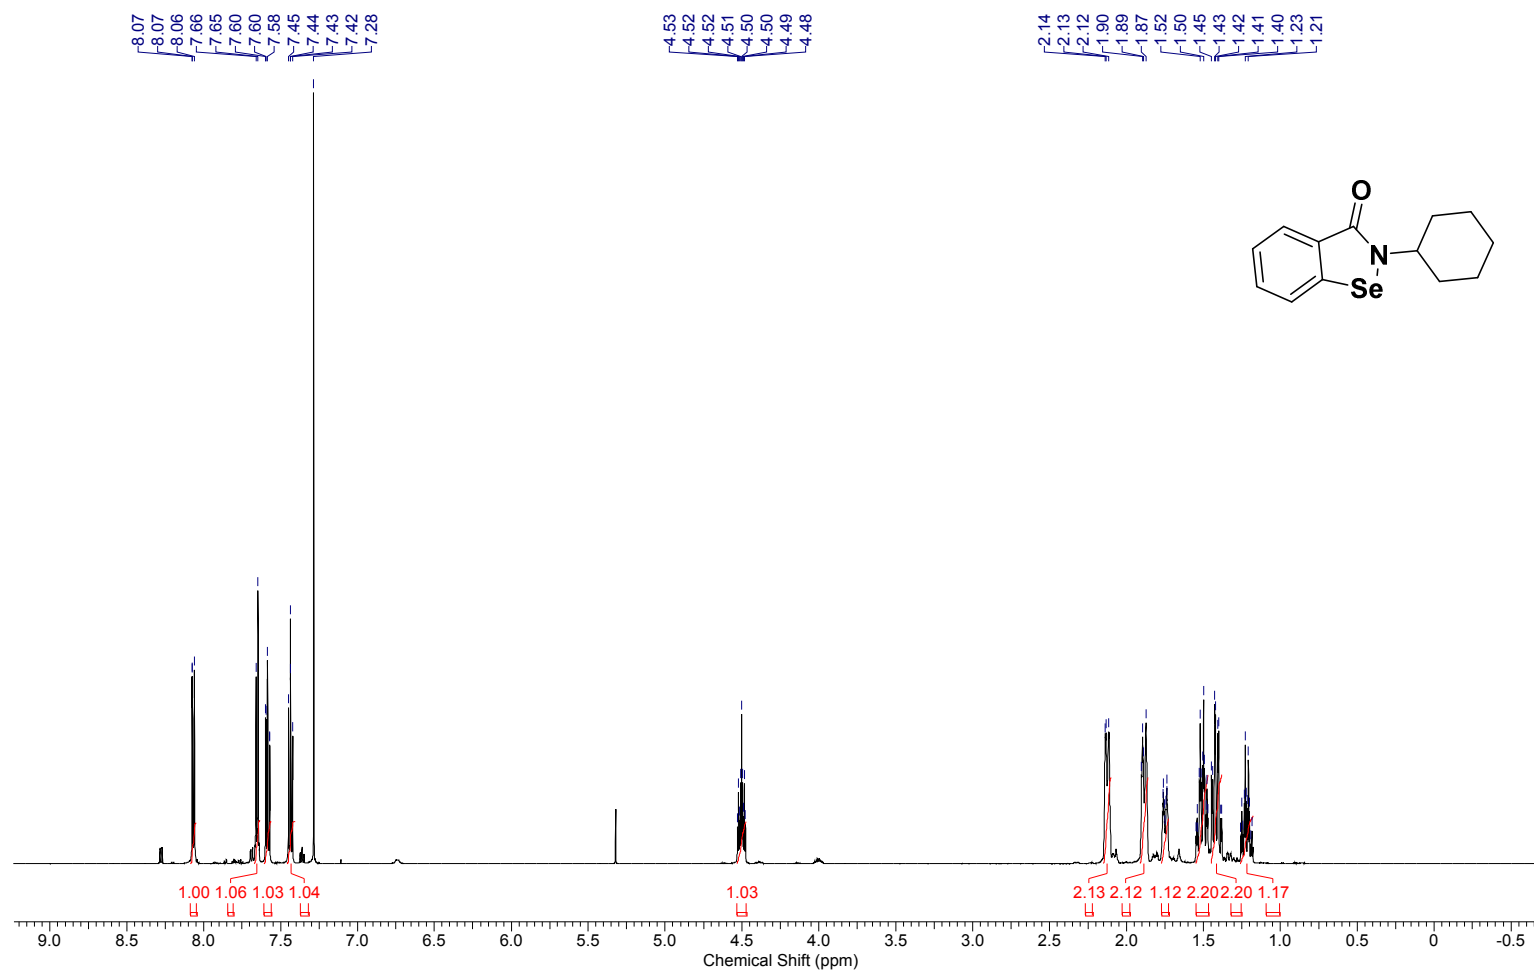

<sup>13</sup>C-NMR of 2-cyclohexylbenzo[d][1,2]selenazol-3(2H)-one (1n)

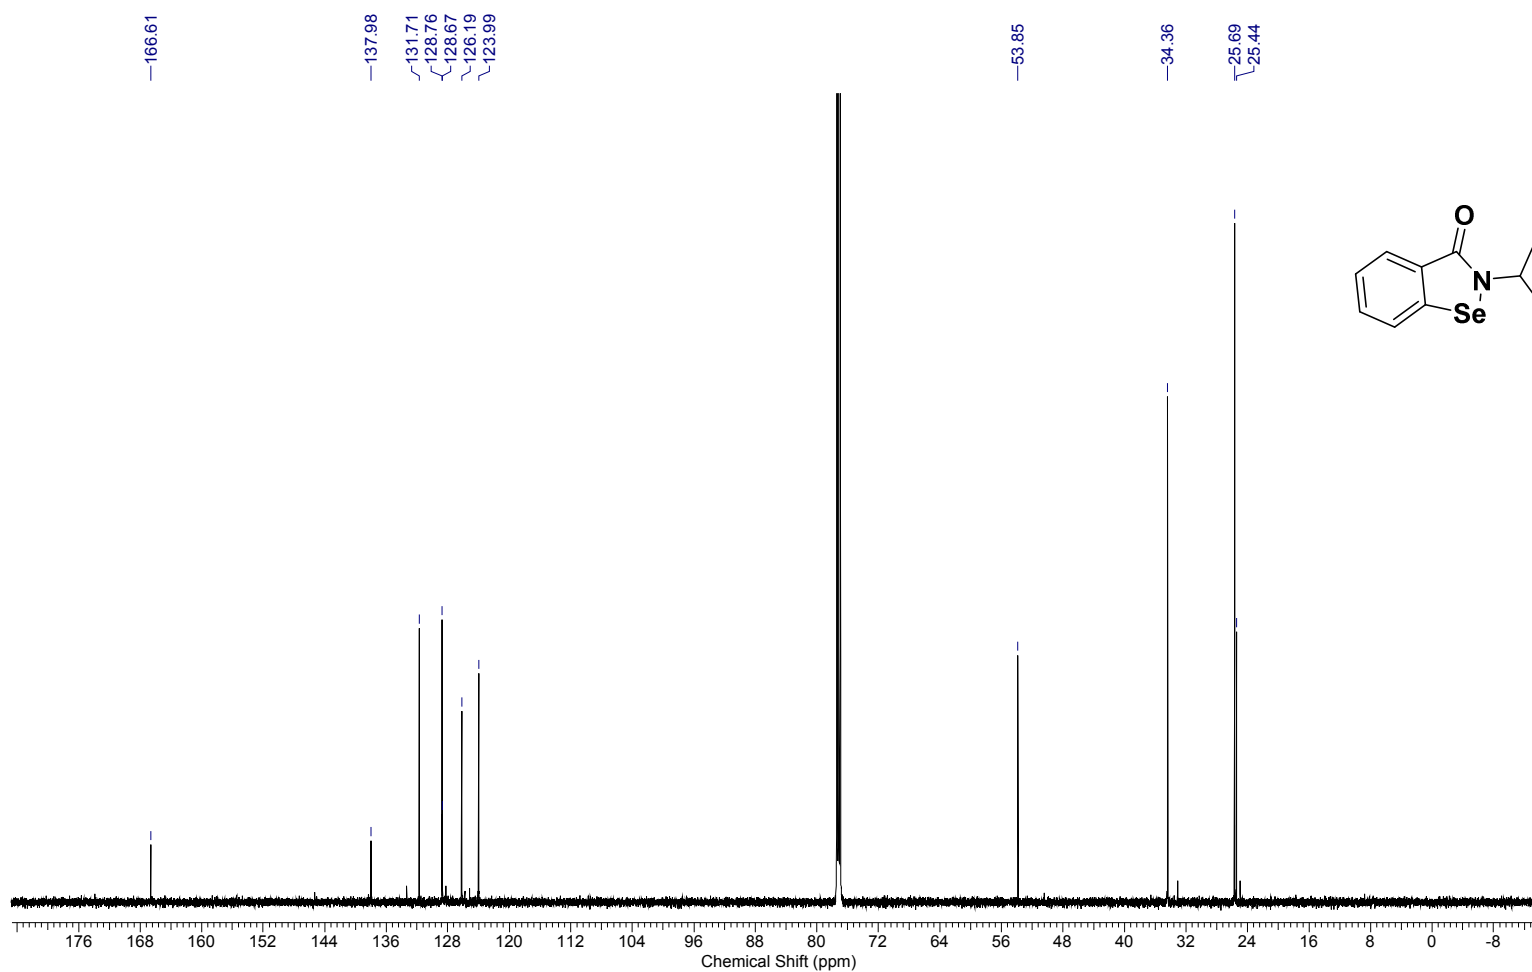

<sup>1</sup>H-NMR of *N*-(4-azidophenyl)-2-((phenylethynyl)selanyl)benzamide (8)

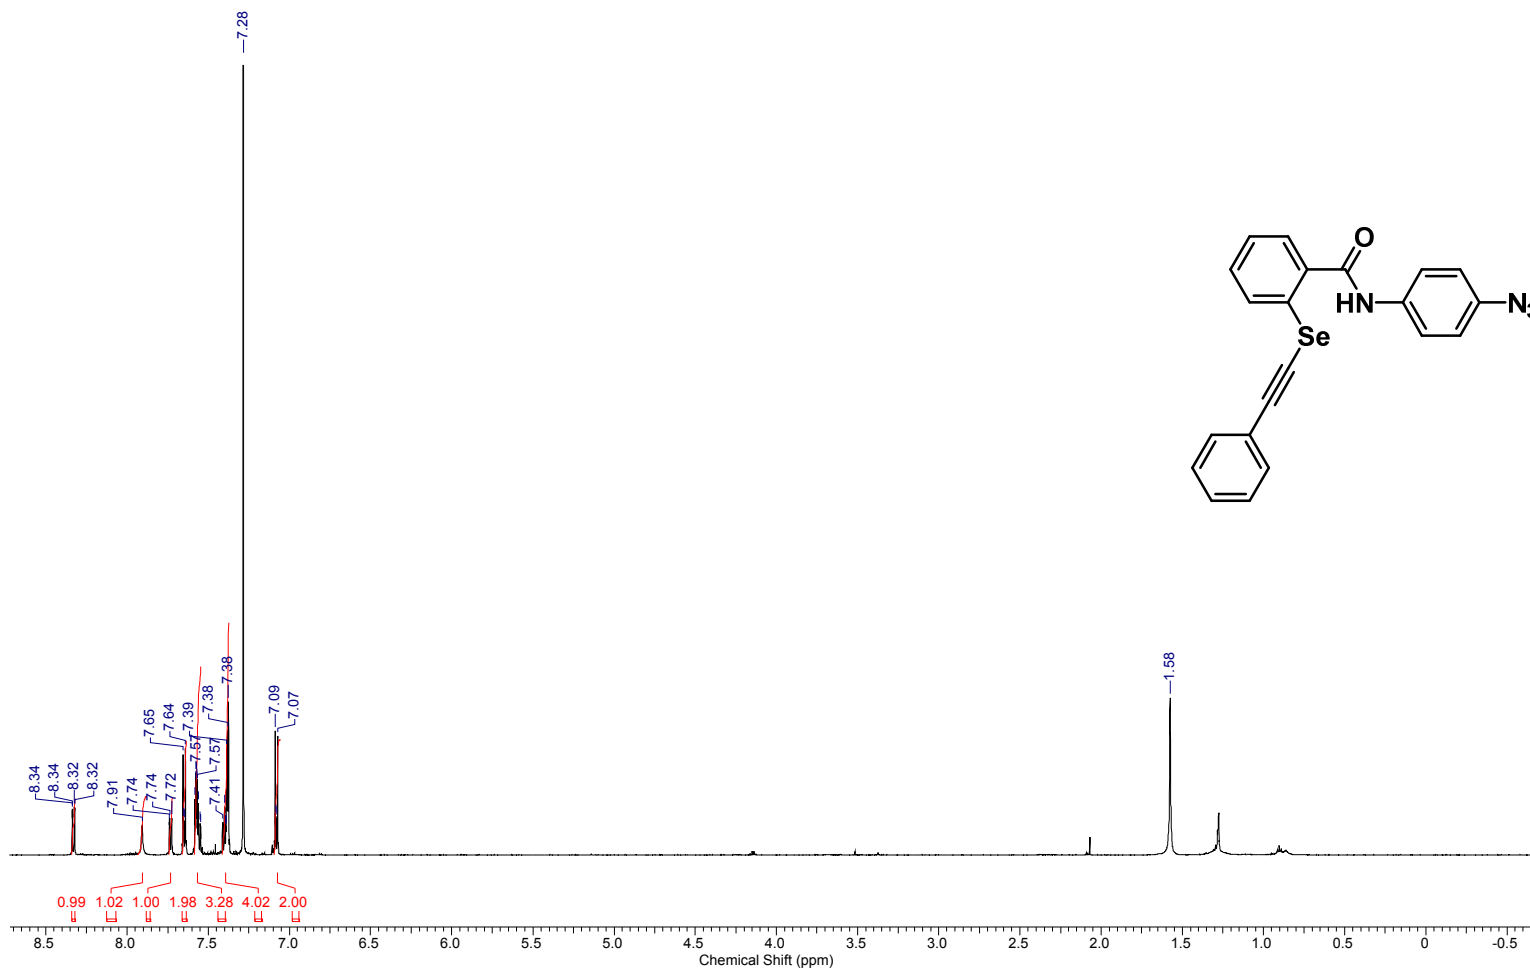

<sup>13</sup>C-NMR of *N*-(4-azidophenyl)-2-((phenylethynyl)selenanyl)benzamide (8)

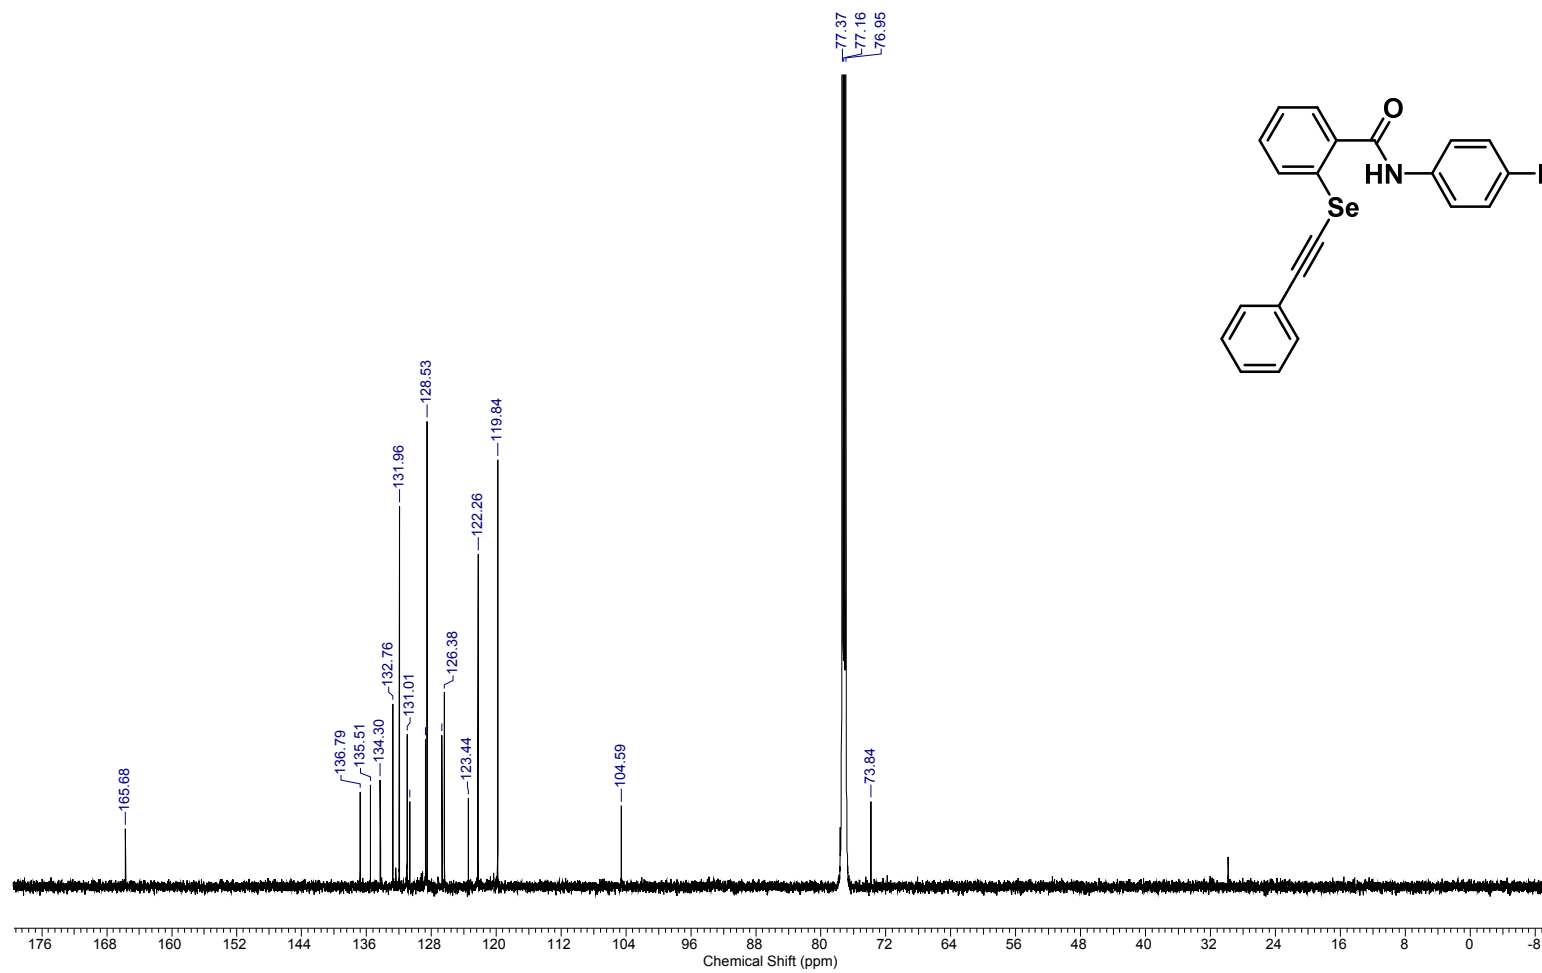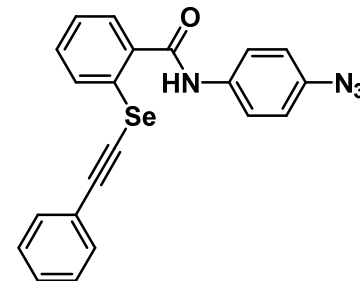

**<sup>1</sup>H-NMR** of ***N*-(13,16-dioxo-16-(3-(4-(3-oxobenzo[*d*][1,2]selenazol-2(3*H*)-yl)phenyl)-3,9-dihydro-8*H*-dibenzo[*b,f*][1,2,3]triazolo[4,5-*d*]azocin-8-yl)-3,6,9-trioxa-12-azahehexadecyl)-5-((3*aS*,6*aR*)-2-oxohexahydro-1*H*-thieno[3,4-*d*]imidazol-4-yl)pentanamide (10)**

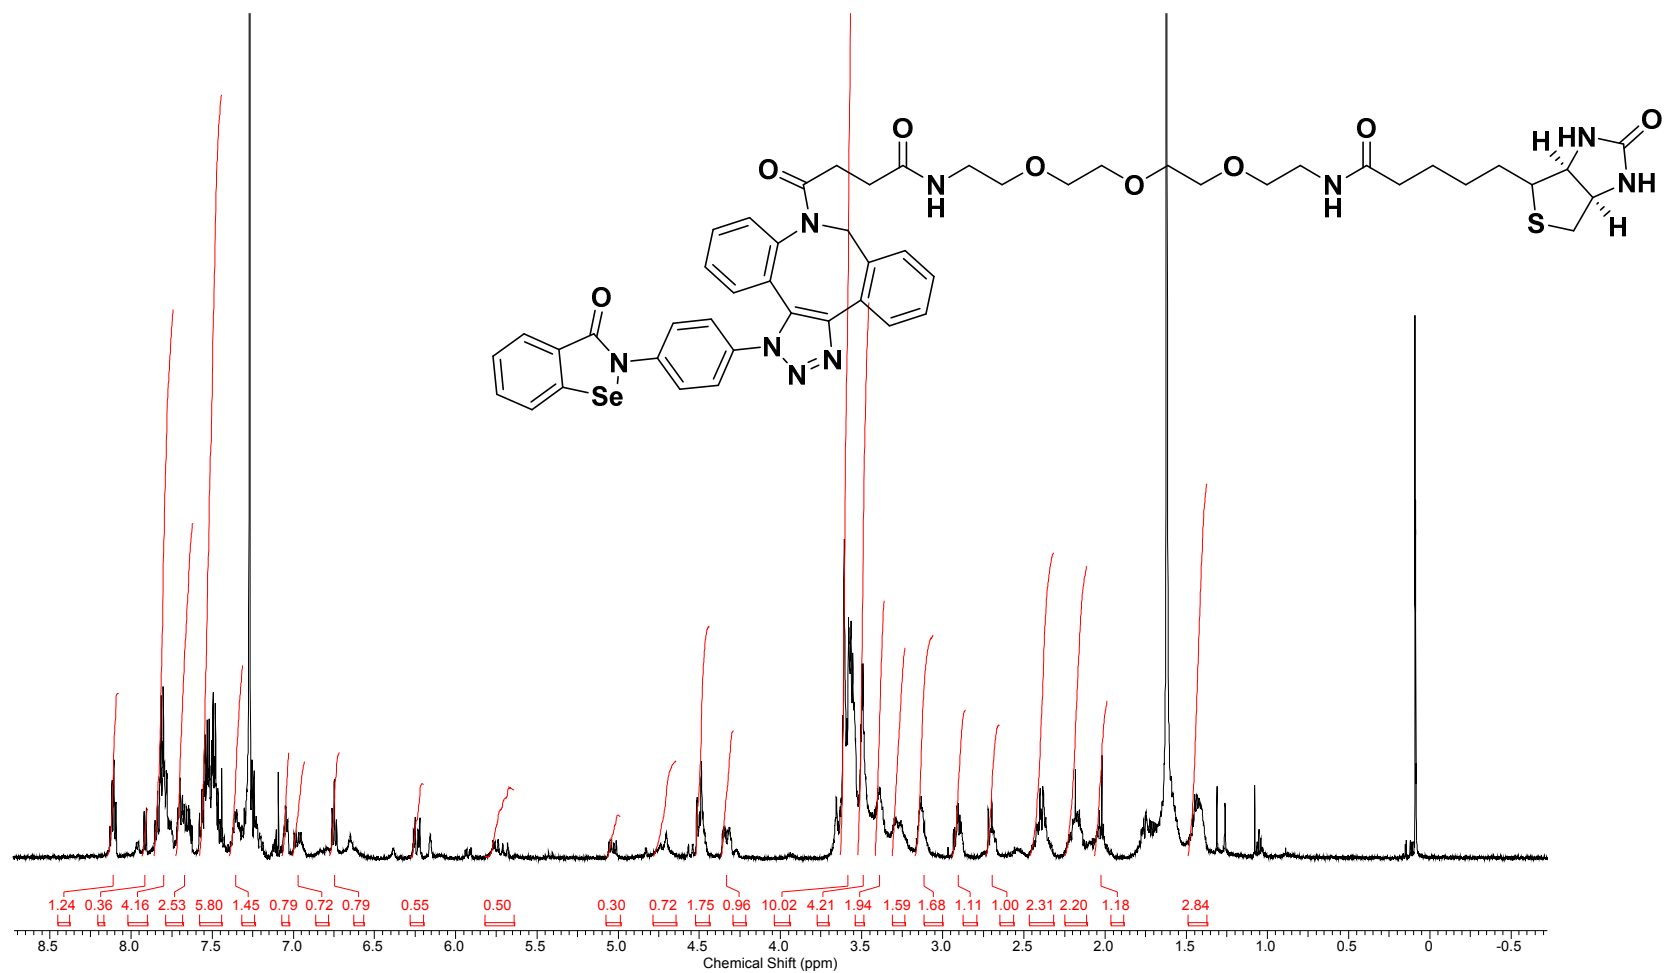



**$^{13}\text{C}$ -NMR of *N*-(13,16-dioxo-16-(3-(4-(3-oxobenzod[1,2]selenazol-2(3*H*)-yl)phenyl)-3,9-dihydro-8*H*-dibenzo[*b,f*][1,2,3]triazolo[4,5-*d*]azocin-8-yl)-3,6,9-trioxa-12-azahexadecyl)-5-((3*aS*,6*aR*)-2-oxohexahydro-1*H*-thieno[3,4-*d*]imidazol-4-yl)pentanamide (10)**

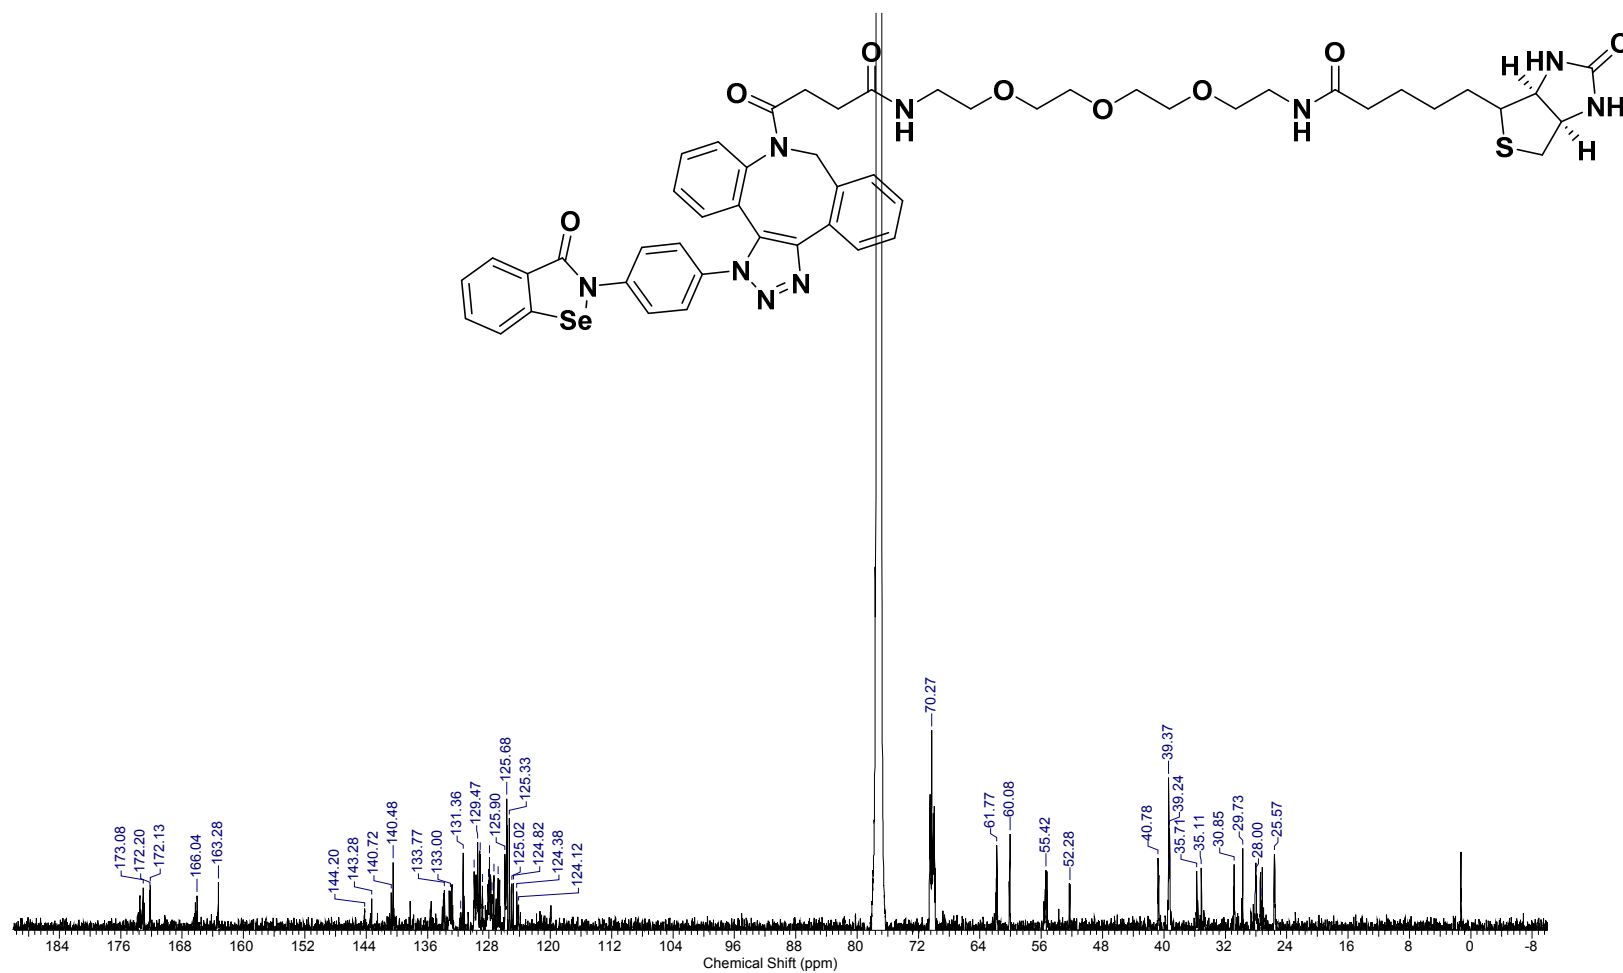

<sup>1</sup>H-NMR of 2-isobutylbenzo[d][1,2]selenazol-3(2H)-one (1o)

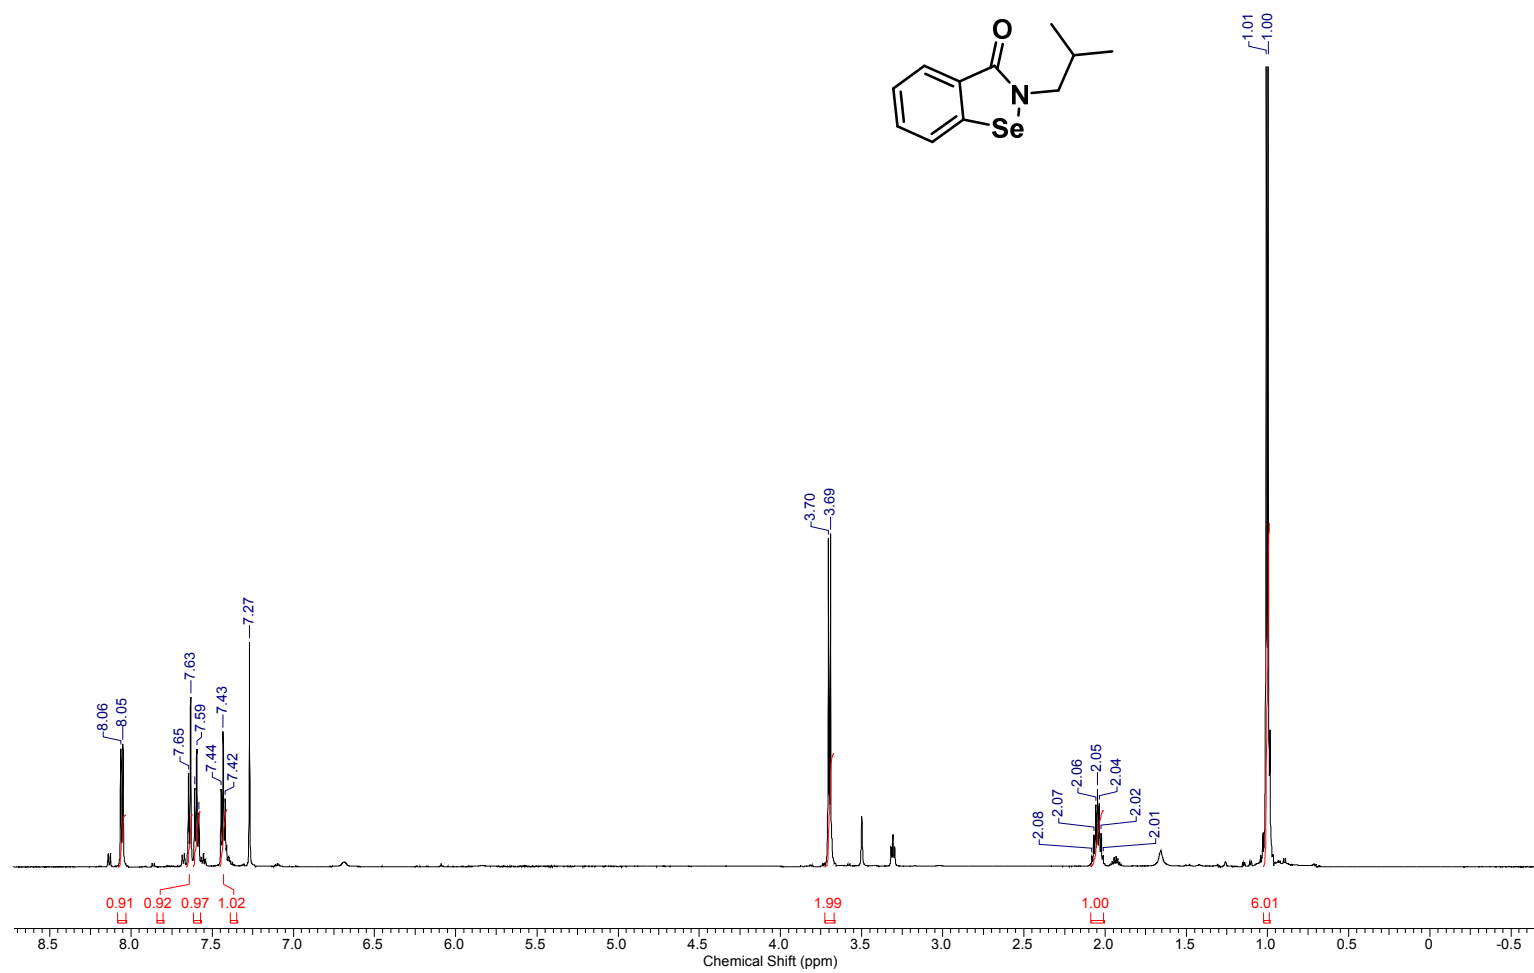

<sup>13</sup>C-NMR of 2-isobutylbenzo[d][1,2]selenazol-3(2H)-one (1o)

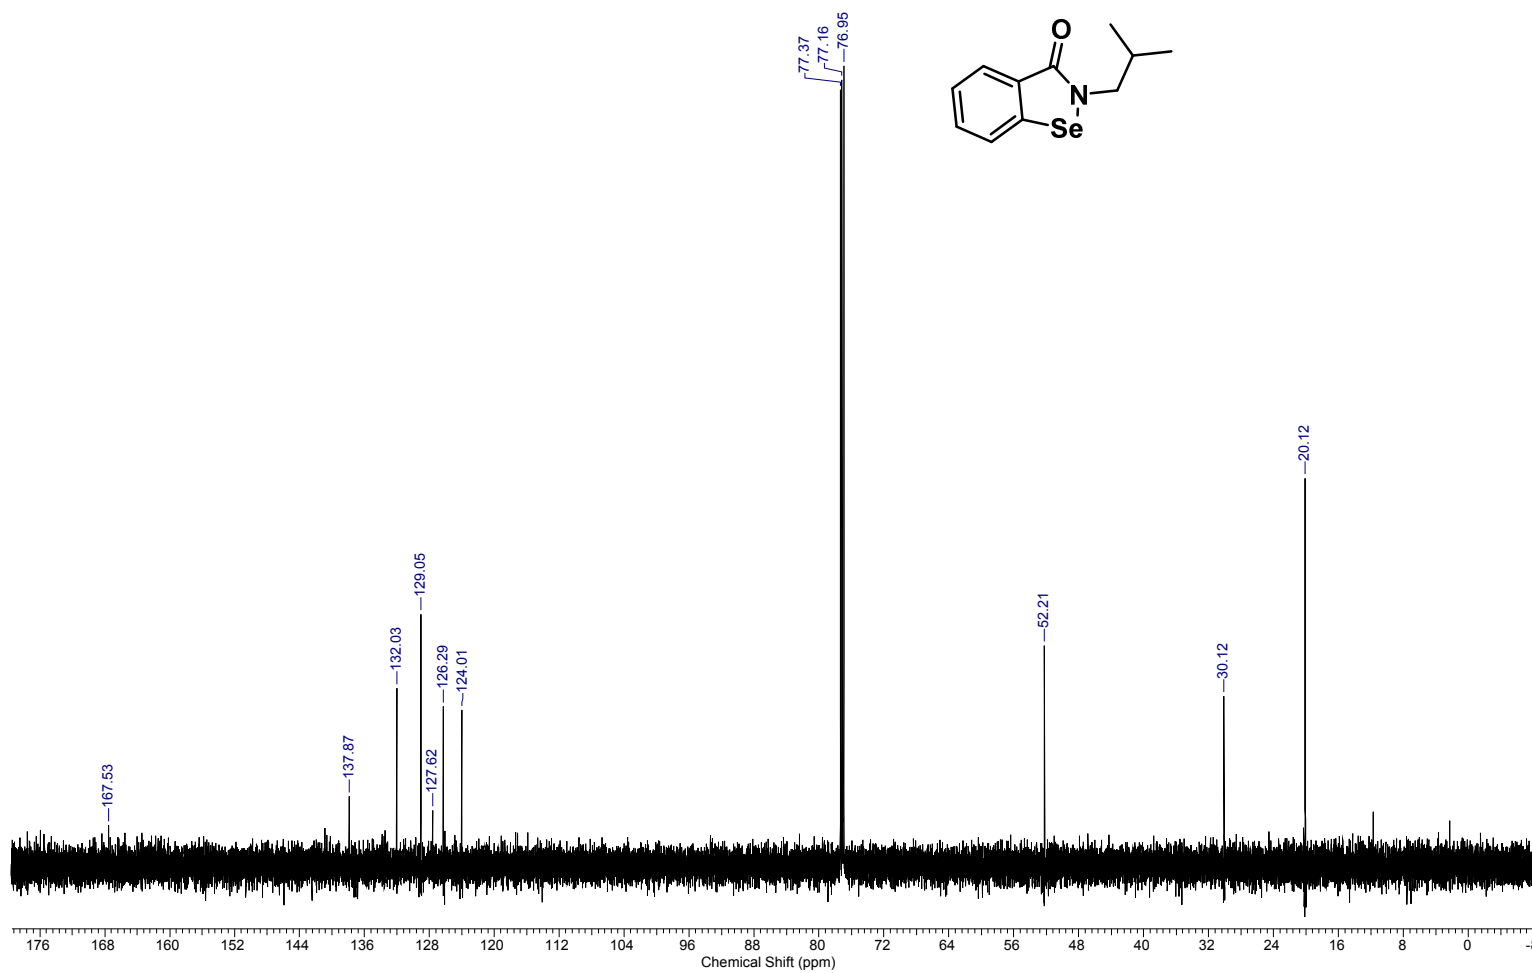

Percent *Mtb* Ag85C Activity Remaining after 40 mins of Incubation  
with 5  $\mu$ M Inhibitor

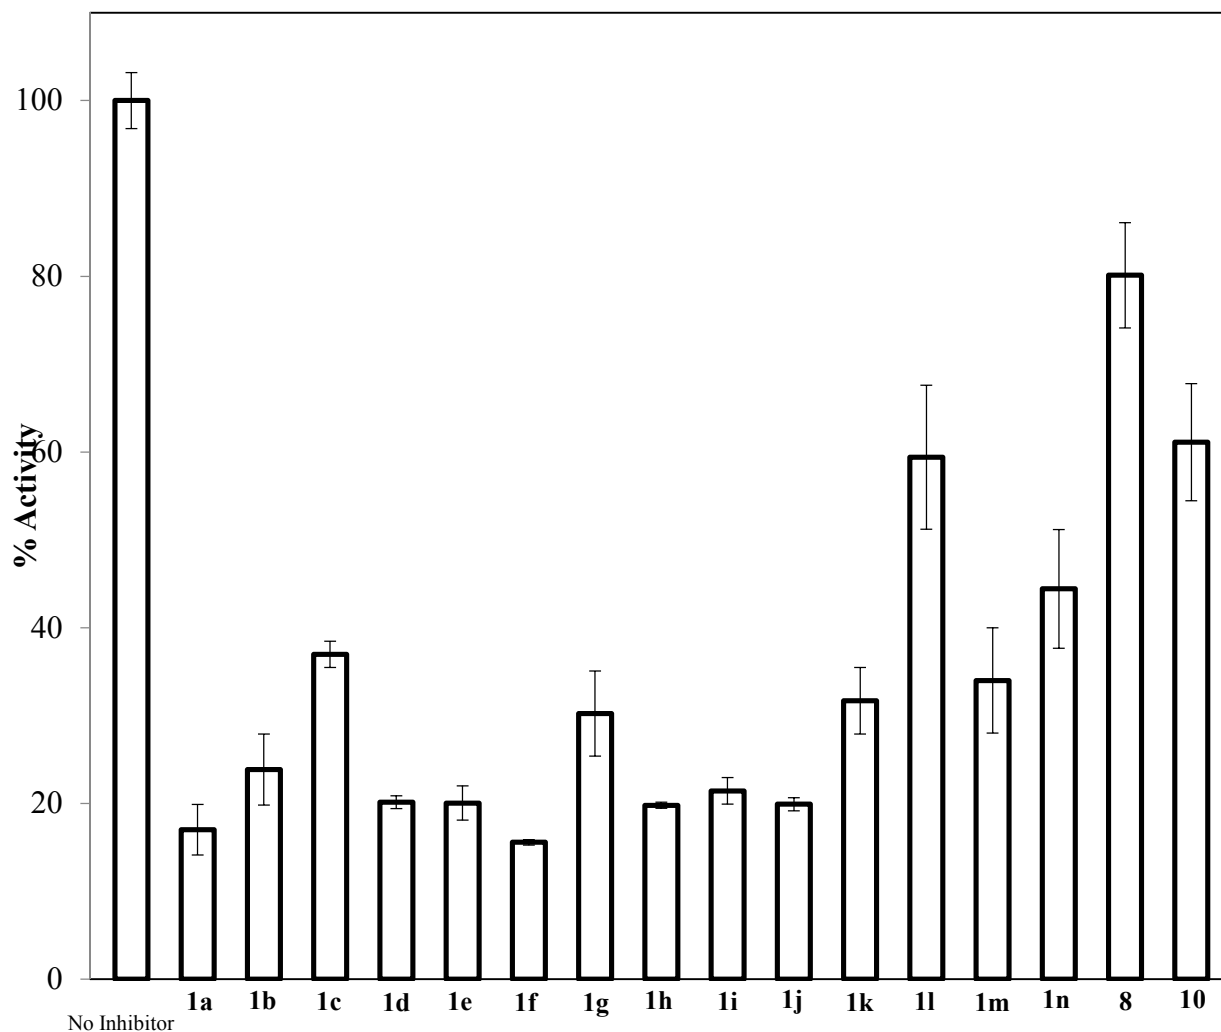

**Figure S7.** The enzymatic activity of *Mtb* Ag85C was evaluated after 40 min of incubation with 5  $\mu$ M 2-alkyl-1,2-benzisoselenazol-3(2*H*)-one **1a-1n**, **8**, and **10**. Enzyme activity was normalized to the control reaction that contained no inhibitor. The error bars are calculated by performing each experiment in triplicate.

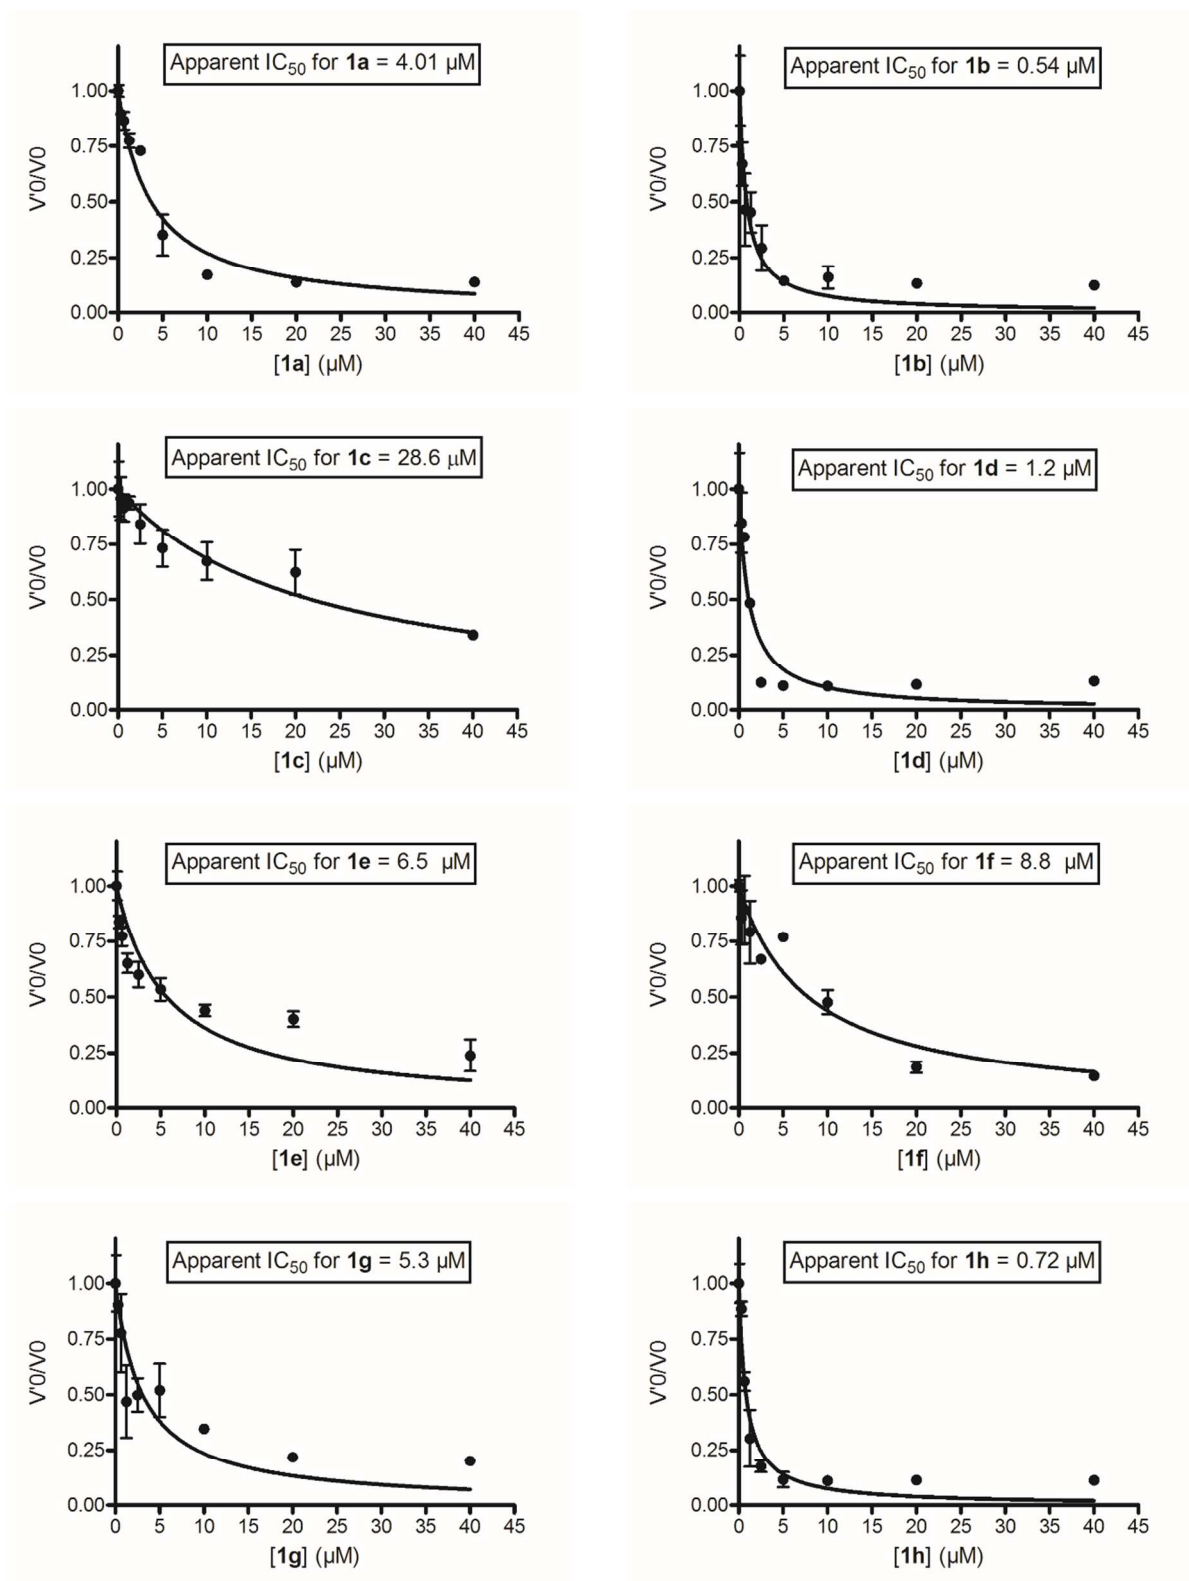

**Figure S8A.** Apparent  $\text{IC}_{50}$  for 1,2-benzisoselenazol-3(2H)-ones. Error bars are calculated by performing each experiment in triplicate.

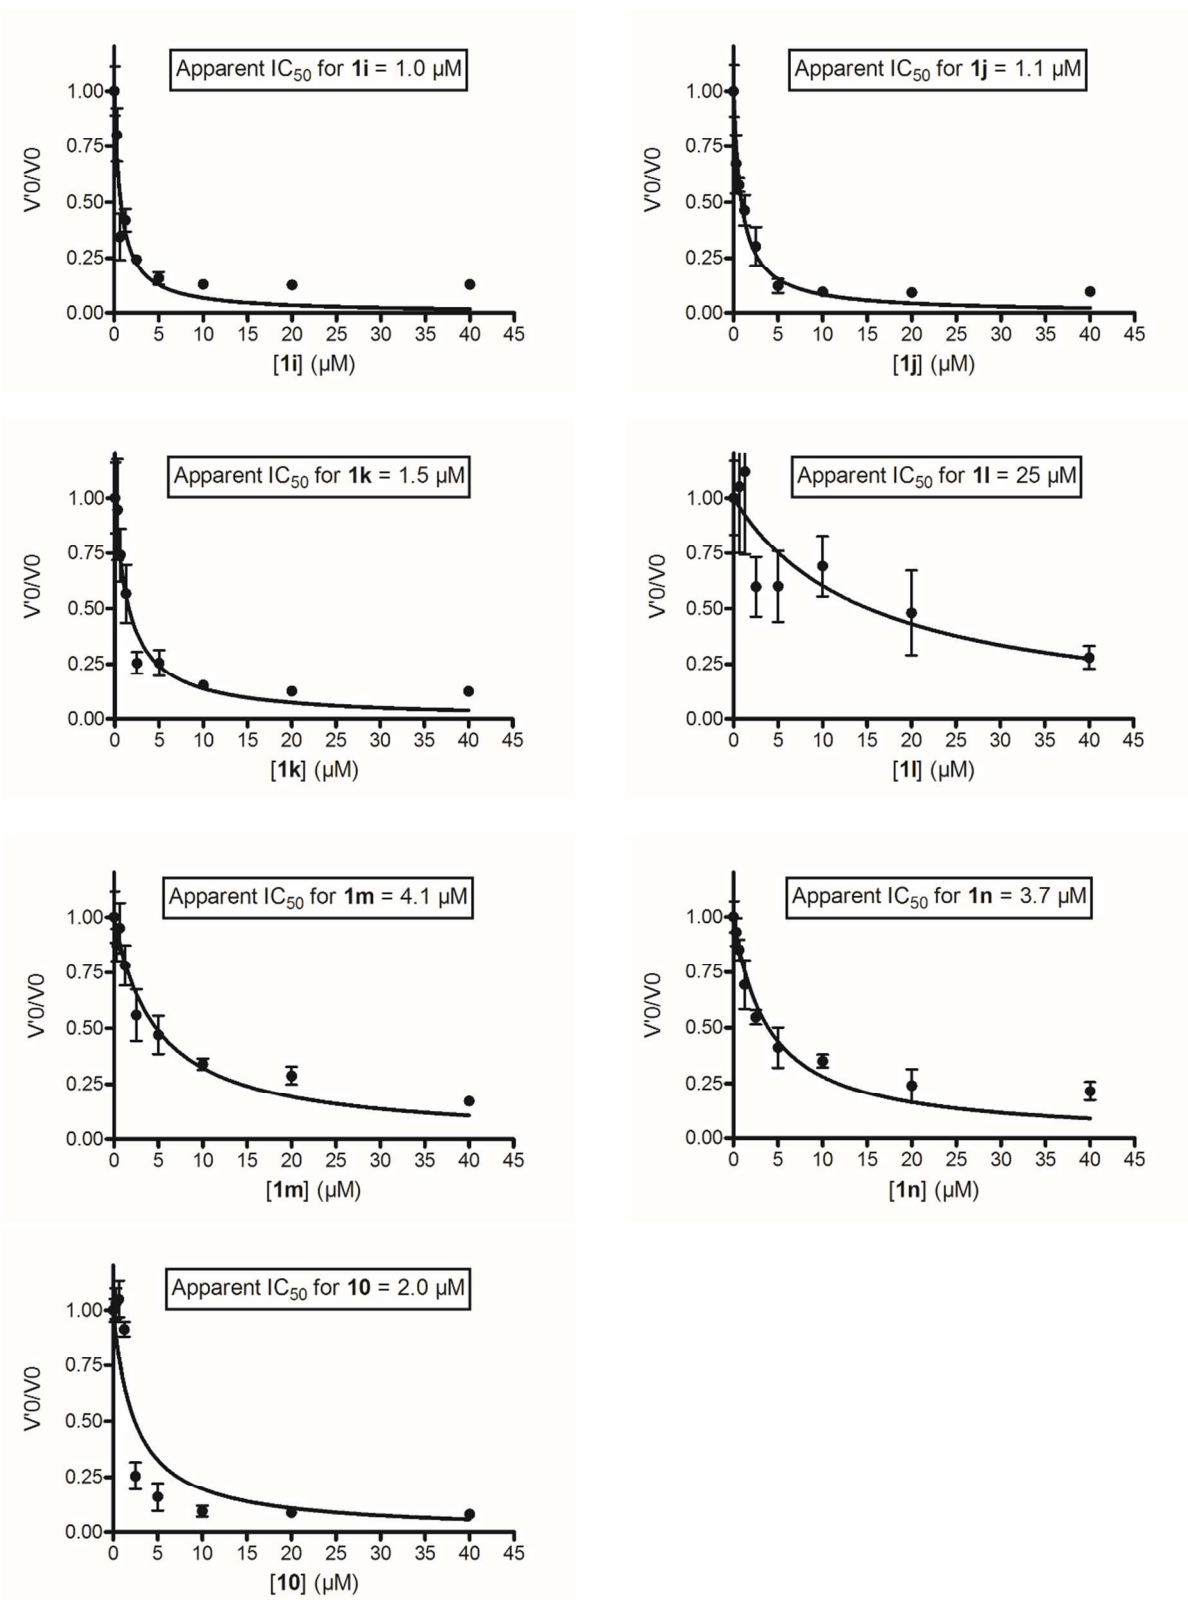

**Figure S8B.** Apparent  $IC_{50}$  for 2-alkyl-1,2-benzisoselenazol-3(2H)-ones. Error bars are calculated by performing each experiment in triplicate.
